## **Design of synthetic human gut microbiome assembly and function**

Ryan L. Clark<sup>1</sup>, Bryce M. Connors<sup>1,3</sup>, David M. Stevenson<sup>2</sup>, Susan E. Hromada<sup>1,2</sup>, Joshua J. Hamilton<sup>1</sup>, Daniel Amador-Noguez<sup>2</sup> & Ophelia S. Venturelli<sup>1,2,3\*</sup>

<sup>1</sup>Department of Biochemistry, University of Wisconsin-Madison, Madison, WI 53706

<sup>2</sup>Department of Bacteriology, University of Wisconsin-Madison, Madison, WI 53706

<sup>3</sup>Department of Chemical & Biological Engineering, University of Wisconsin-Madison, Madison, WI 53706

\*To whom correspondence should be addressed: [venturelli@wisc.edu](mailto:venturelli@wisc.edu)

## 1 ABSTRACT

2 The assembly of microbial communities and functions emerge from a complex and dynamic web  
3 of interactions. A major challenge in microbiome engineering is identifying organism  
4 configurations with community-level behaviors that achieve a desired function. The number of  
5 possible subcommunities scales exponentially with the number of species in a system, creating  
6 a vast experimental design space that is challenging to even sparsely traverse. We develop a  
7 model-guided experimental design framework for microbial communities and apply this method  
8 to explore the functional landscape of the health-relevant metabolite butyrate using a 25-member  
9 synthetic human gut microbiome community. Based on limited experimental measurements, our  
10 model accurately forecasts community assembly and butyrate production at every possible level  
11 of complexity. Our results elucidate key ecological and molecular mechanisms driving butyrate  
12 production including inter-species interactions, pH and hydrogen sulfide. Our model-guided  
13 iterative approach provides a flexible framework for understanding and predicting community  
14 functions for a broad range of applications.

## 15 INTRODUCTION

16 Microbial communities carry out pivotal chemical transformations in nearly every environment on  
17 Earth<sup>1</sup>. Many of these processes critically impact human health and environmental sustainability,  
18 including oceanic CO<sub>2</sub>-fixation<sup>2</sup>, production of growth-promoting molecules in the plant  
19 rhizosphere<sup>3</sup>, and degradation of indigestible dietary substrates<sup>4</sup>. Microbial community dynamics  
20 and functions are determined by complex and dynamic interactions between constituent  
21 community members and their environment. Developing the capabilities to engineer microbiome  
22 properties holds promise to address grand challenges facing human society<sup>5</sup> and methods to  
23 predict microbiome functions are needed to enable microbiome engineering efforts.

24 A bottom-up approach to build and characterize synthetic microcosms has key  
25 advantages including reduced complexity compared to natural systems, ability to manipulate  
26 environmental parameters and community membership and achieve a high temporal resolution.  
27 Previous studies have leveraged synthetic microcosms of bacteria isolated from the human gut<sup>6</sup>  
28 or soil<sup>7</sup> to demonstrate that dynamic models based on pairwise interactions are predictive of multi-  
29 species community assembly. In addition, modeling community assembly using pairwise  
30 interactions has provided a deeper understanding of the effects of environmental factors including  
31 pH<sup>8</sup>, dilution<sup>9</sup>, nutrient availability<sup>10</sup>, toxins<sup>11</sup>, and temperature<sup>12</sup> on microbial community  
32 behaviors.

33 A key challenge for predicting microbiome properties is mapping community composition  
34 to community-level metabolic functions. Genome-scale metabolic models have been used to  
35 predict collective metabolic outputs of microbial communities, an approach which is limited by the  
36 quality of functional gene annotations and stringent assumptions<sup>13</sup>. Bottom-up assembly of  
37 microbial consortia coupled to mathematical modeling has been used to interrogate how the  
38 production or consumption of molecules changes in a community context relative to individual  
39 species<sup>11,14,15</sup>. However, computational frameworks to predict both community dynamics and  
40 functional outputs for high-dimensional communities that mirror the complexity of natural  
41 microbiomes are needed to harness the potential of microbiome engineering for diverse  
42 applications.

43 A detailed and quantitative understanding of microbial interaction networks would enable  
44 the design of microbial consortia with robust target functions from the bottom up. While model-  
45 guided design<sup>16</sup> has been used to identify gut microbial communities that elicit a target immune  
46 response in mouse models, the complexity of the host system and the low-throughput of mouse  
47 studies limits the observability of system parameters and a comprehensive understanding of

48 ecological factors shaping microbiome behaviors. Here, we use a data-driven approach to build  
49 a model of butyrate production by complex *in vitro* communities of human-associated intestinal  
50 isolates. Butyrate production is a major function of the gut microbiome associated with protection  
51 from a wide range of human diseases, including arthritis<sup>17</sup>, diet-induced obesity<sup>18–20</sup>, colitis<sup>21,22</sup>,  
52 opportunistic pathogen infection<sup>23</sup>, diabetes<sup>24</sup>, and colorectal cancer<sup>25</sup>. Our approach leverages  
53 data-driven models to quantify interactions impacting the growth dynamics of functional  
54 organisms and interpretable statistical models to quantify interactions impacting metabolic  
55 activities (functional yield of butyrate per unit biomass). By modeling these two interaction types  
56 separately, we demonstrate that in some contexts, accurate prediction of functional organism  
57 abundance can predict function, while in other community contexts containing metabolically  
58 flexible ecological driver species, interactions modifying metabolic modes must be captured to  
59 predict function. We use these models to design communities of up to 25 species with a broad  
60 range of butyrate production capabilities and analyze our model as well as the metabolic profiles  
61 and environmental modification of designed consortia to provide key insights into metabolic  
62 interactions impacting butyrate production.

## 63 RESULTS

64 Identifying highly functional microbial communities from the bottom-up is a major challenge  
65 because the number of sub-communities exponentially increases with the system dimension<sup>26</sup>.  
66 To explore community design space, we develop a modeling framework to guide iterative design  
67 of experiments (**Figure 1a,b**). Ecosystem functions can be modulated by selection effects,  
68 defined as changes in function correlated with changes in the abundance of functional species,  
69 or complementarity effects, defined as changes in the functional yield per unit biomass for each  
70 functional species<sup>27–29</sup>. We implement a dual module modeling framework to determine the  
71 contributions of microbe-microbe interactions to each of these effect types. A community dynamic  
72 model, referred to as the generalized Lotka-Volterra model (gLV), predicts community assembly  
73 and the function model predicts a functional activity from community composition (**Figure 1a**).  
74 The gLV model is an ordinary differential equation model that captures the temporal change in  
75 species abundances due to monospecies growth parameters and inter-species interactions and  
76 has been used to predict and analyze multi-species community assembly based on  
77 measurements of lower-order communities<sup>6</sup>. Our function model consists of a regression model  
78 with interaction terms mapping species abundance at a specific time point to the concentration of  
79 an output metabolite. The inter-species interaction terms in the gLV model represent selection  
80 effects (i.e. how one species impacts the growth of another) and the interaction terms in the  
81 regression model represent complementarity effects (i.e. deviations from constant yield of a  
82 function per unit biomass<sup>15</sup>) (**Figure 1a,c**). For the gLV model, we use Bayesian parameter  
83 inference techniques to determine the uncertainty in our parameters based on biological and  
84 technical variability in the experimental data<sup>30</sup>. The composite gLV and statistical models predict  
85 the probability distribution of the functional activity given an initial condition of species abundances  
86 (**Figure 1a, Methods**).

87 Due to significant interest in development of defined bacterial therapeutics for human  
88 health applications<sup>31</sup> and the beneficial role of butyrate produced by gut microbiota on a myriad  
89 of health outcomes<sup>17–25,32</sup>, we sought to apply our modeling framework to understand how  
90 community composition impacts butyrate production in synthetic communities of prevalent and  
91 diverse human gut microbes. Butyrate production is a specialized function of a subset of species  
92 in the gut (~10-25% of microbial genomes are predicted to harbor this pathway in healthy  
93 individuals<sup>33</sup>). By contrast, the production of other metabolic byproducts such as acetate and  
94 lactate are distributed more broadly across members of the gut microbiome. Thus, studying  
95 butyrate production allows us to investigate how ecological forces shape a function performed  
96 only by a specific subset of the community. Indeed, predictably modulating a specific function

97 performed by a subset of organisms constitutes a core goal of microbiome engineering across  
98 different environments<sup>34–36</sup>.

99 To develop a system of microbes representing major metabolic functions in the gut, we  
100 selected 25 highly prevalent bacterial species from all major phyla in the human gut microbiome<sup>37</sup>.  
101 This community contained 5 butyrate producing Firmicutes which have been shown to play  
102 important roles in human health and protection from diseases (**Figure 2a, Table S1**). These 5  
103 Firmicutes have the capability to ferment sugars and/or transform acetate to butyrate, allowing  
104 the recovery of NAD<sup>+</sup> for further energy generation<sup>38</sup>. Additionally, *Anaerostipes caccae* (AC) can  
105 ferment lactate and acetate to butyrate, generating a modest amount of energy<sup>39</sup>. However, each  
106 of these species can alternatively produce acetate and/or lactate as fermentation products  
107 depending on the environmental context (**Figure 2b**).

108 Due to lack of defined media that universally support growth of gut microbes, most *in vitro*  
109 studies use rich media, making it difficult to interrogate the effects of unknown components on  
110 community behaviors<sup>40</sup>. To maximize our knowledge of the substrates available to the  
111 communities in our experiments and to simplify the metabolite quantification, we developed a  
112 single chemically defined medium that supports the growth of all species in monoculture with the  
113 exception of *Faecalibacterium prausnitzii* (FP) (**Methods**). We measured time-resolved growth of  
114 each species and constructed a gLV null model that assumed no inter-species interactions. Our  
115 results demonstrated a wide variety of growth dynamics within each phylum, including disparate  
116 growth rates and carrying capacities (**Figure 2c**). Using this system, we implemented an iterative  
117 design, test, learn (DTL) cycle (**Figure 1b**) to explore a vast community design space and explore  
118 an ecosystem functional landscape.

#### 119 *Butyrate production impacted by selection and complementarity*

120 For the first cycle of our iterative DTL approach, we sought to decipher interactions impacting  
121 butyrate production in pairwise communities, with the goal of understanding how these  
122 interactions combine to shape community assembly and butyrate production in higher complexity  
123 communities. We grew each pairwise community containing at least one butyrate producer (the  
124 focal species of our system<sup>41</sup>) and measured species abundance and the concentrations of  
125 organic acid fermentation products (including butyrate, lactate, succinate and acetate) after 48  
126 hours. Based on previous studies using pairwise communities to predict higher complexity  
127 community behaviors<sup>6,14,42</sup>, we hypothesized that these measurements would provide a highly  
128 informative dataset to develop an initial model that captured inter-species interactions shaping  
129 selection and complementarity effects in the system.

130 Based on our data, we first considered to what extent butyrate production was impacted  
131 by selection effects and complementarity effects using a model-free approach (**Figure 2d**). For  
132 each pairwise community, the selection effect was computed as the difference between the  
133 expected butyrate concentration assuming constant butyrate yield and the monoculture butyrate  
134 concentration (**Figure S1**). The complementarity effect was defined as the difference between the  
135 measured butyrate concentration of the community and the expected butyrate concentration  
136 assuming constant yield (**Figure S1, Methods**). Negative selection effects influenced all butyrate  
137 producers except FP, which did not grow in monoculture (**Figure 2d, inset**). Compared to the  
138 other butyrate producers, *Roseburia intestinalis* (RI) exhibited the largest negative selection  
139 effects, while AC tended to display positive complementarity effects. In sum, both selection and  
140 complementarity can modulate butyrate production, highlighting the utility of a building a  
141 composite model that captures both types of effects (**Figure 1a**). Further, the model-free  
142 approach to determining the contributions of selection and complementarity effects cannot be  
143 applied to communities containing multiple butyrate-producers. Therefore, our modeling approach  
144 can elucidate the selection and complementarity effects in communities with functional  
145 redundancy, representing real systems<sup>33</sup>.

146 To enable prediction of butyrate concentration in higher complexity communities, we used  
147 the data from the monoculture and pairwise community experiments to train our model (M1). The  
148 inferred gLV inter-species interaction network showed many negative interactions, including  
149 strong negative interactions impacting the growth of RI, consistent with the dominance of negative  
150 selection effects in our model-free analysis of RI pairwise communities (**Figure 2e**). A network  
151 representation of the parameters in the regression model indicated that AC had significantly more  
152 pairwise interaction terms than the other butyrate producers, consistent with the major role of  
153 positive complementarity effects in our model-free analysis of AC pairwise communities (**Figure**  
154 **2f**).

### 155 *Model trained on pairwise consortia predicts 3-5 species community behaviors*

156 To test our model's ability to predict function in communities with an incremental increase in  
157 complexity, we implemented a second DTL cycle with the goal of mapping the functional  
158 landscape of 3-5 member communities. Model M1 was informed only by pairwise communities  
159 that contained at least one butyrate producer and was thus naive to all interactions between non-  
160 butyrate producers. Therefore, we needed to make some assumptions to enable prediction of  
161 multi-species consortia containing combinations of non-butyrate producers. Based on patterns  
162 observed in previous gLV model parameter sets<sup>6</sup>, we hypothesized that unmeasured interactions  
163 could be estimated based on the trends in measured interactions across phylogenetic  
164 relatedness. Therefore, we used a matrix imputation method to estimate interaction parameters  
165 for unmeasured interactions in the gLV model (**Methods**). The resulting model was used to predict  
166 the probability distributions of butyrate production for all 3-5 species communities containing at  
167 least one butyrate producer (46,588 communities). The predicted butyrate production varied  
168 substantially between the combinations of butyrate-producer groups (**Figure 3a**). To evaluate the  
169 ability of our model to predict the behaviors of butyrate producers in a variety of community  
170 contexts, we experimentally characterized 156 communities that spanned a broad range of  
171 predicted butyrate concentrations across the butyrate-producer groups (**Figure 3a**). The model  
172 prediction exhibited good agreement with the rank order of butyrate production (Spearman  
173  $\rho=0.84$ ,  $p=9*10^{-43}$ ), though moderately overpredicted the magnitude on average (**Figure 3b**).

174 The quality of these predictions demonstrated that our initial dataset was sufficient to build  
175 a model predicting broad trends in butyrate production but suggested that additional data was  
176 required to predict specific outliers. To understand the factors contributing to deviations between  
177 predicted and measured butyrate concentrations, we updated our models to decipher key inter-  
178 species interactions that model M1 failed to capture yielding model M2. The gLV model from M2  
179 contained many new negative interaction parameters (46 new negative interactions, 15 conserved  
180 negative interactions) and sparse positive interactions (3 new and 2 conserved positive  
181 interactions) out of 386 possible observed interspecies interaction parameters in the designed  
182 set, primarily between non-butyrate producers (**Figure 3c**, **Figure S2**). The regression model in  
183 M2 highlighted significant complementarity effects in the 3-5 member communities, with strong  
184 negative interactions between *Desulfovibrio piger* (DP)-AC and AC-*Eubacterium rectale* (ER)  
185 consistent with model M1 (**Figure 2f**). We used the regression model with the experimental  
186 abundance measurements to quantify the magnitude and variability of each complementarity  
187 interaction across the experimentally measured communities due to differences in species  
188 growth. These data showed that some interactions consistently modified butyrate production in  
189 the presence of the species pair (e.g. DP-AC), whereas the contributions of other interactions to  
190 butyrate production varied across communities (e.g. ER-RI, *Clostridium asparagiforme* (CG)-AC)  
191 (**Figure 3d**). Equipped with this updated model, we set out to explore our model's experimental  
192 design capabilities for communities of even greater complexity (i.e. >10 species).

## 193 *Model-guided exploration of complex community design space*

194 One approach to determining the contributions of constituent community members to ecosystem  
195 behaviors involves characterization of the full and all single-species dropout consortia<sup>6,26</sup>. In our  
196 system, all 24 and the 25 member communities exhibited similar low butyrate production (~10-15  
197 mM Butyrate), except for a moderate increase of butyrate in the DP-lacking community (~22 mM  
198 Butyrate) and a large decrease in the AC-lacking community (~2 mM Butyrate) (**Figure S3**). Many  
199 of the 3-5 member communities displayed higher butyrate production than the highest complexity  
200 communities (**Figure 3b**), suggesting that high complexity communities may trend towards an  
201 undesired low butyrate producing state. Additionally, the concentrations of all measured organic  
202 acids spanned a much smaller range in the 24 and 25 member communities than the low  
203 complexity (1-5 member) assemblages (**Figure S3b**), further supporting the notion that  
204 communities of increasing complexity may trend toward a similar functional state. Indeed, a key  
205 challenge in engineering microbial communities is the tendency to assemble to compositional  
206 attractors and resist change, due to a multitude of abiotic and biotic interactions<sup>43-46</sup>. In our  
207 system, implementing a standard approach of analyzing the highest complexity set of consortia  
208 failed to elucidate diverse community metabolic states, highlighting the utility of the model to  
209 design sub-communities that span the functional space.

210 To address this challenge, we used our model M2 to design complex communities (>10  
211 species) that deviated from the observed trend towards low butyrate production. Since the human  
212 gut microbiome exhibits functional redundancy in butyrate pathways<sup>33</sup>, we used model M2 to  
213 simulate the assembly of all communities containing all five butyrate producers to map species  
214 abundance to butyrate concentration (1,048,575 communities). Based on the hypothesis that  
215 high-complexity communities may trend towards low butyrate production, we found it useful to  
216 consider the full community as a reference frame, representing a potential compositional attractor  
217 state, when visualizing the relationship between community composition and butyrate production.  
218 Consistent with this notion, the model predicted the full community to have butyrate production  
219 similar to the average of all communities, with other communities diverging from this average  
220 behavior with increasing distance in composition (Euclidean distance between endpoint  
221 abundances) from the full community (**Figure 4a**). The landscape of communities was partitioned  
222 into two large clusters based on the presence or absence of the prevalent sulfate-reducing  
223 Proteobacteria DP<sup>47</sup>. Corroborating these results, DP had the strongest negative complementarity  
224 interaction with AC and CC in the regression model of M2 as well as a significant negative impact  
225 on butyrate production in the single-species dropout consortia (**Figure 3d, Figure S3a**). This  
226 inferred complementarity effect and predicted shift in the butyrate production landscape suggests  
227 that the presence of DP may substantially alter the metabolic activities shaping butyrate  
228 production.

229 We evaluated the capability of our model to guide broader exploration of the functional  
230 landscape and identify infrequent communities that deviate from the typical behavior by designing  
231 28 low- and 54 high-butyrate communities each with 11-17 members and containing all 5 butyrate-  
232 producers. In addition, we randomly selected 82 communities with the same complexity  
233 constraints to evaluate whether our model-guided design procedure could elucidate a set of  
234 communities that spanned a broader range of metabolic states, scored by the variance in butyrate  
235 concentration (**Figure 4a**). The 82 designed communities exhibited a higher variance in mean  
236 butyrate production than the 82 random communities (designed communities s.d.=11 mM,  
237 random communities s.d.=8 mM, Levene test, p=0.043), demonstrating a major advantage of the  
238 model-guided approach for designing communities to broadly explore regions of the functional  
239 landscape (**Figure 4c**). Consistent with our model predictions, communities containing DP  
240 exhibited lower butyrate compared to communities excluding DP in both the designed and the  
241 randomly chosen communities (**Figure 4c**). While the model predicted the rank order of butyrate

242 concentrations in these communities moderately well (Spearman  $\rho=0.67$ ,  $p=3*10^{-25}$ ), some of  
243 the highest butyrate production communities were underpredicted by the model (**Figure 4c**).

#### 244 *Selection effects dominate in high complexity communities lacking AC*

245 In microbial consortia, the contributions of individual members to a given function can be broadly  
246 distributed, wherein key driver species can exhibit a substantially larger contribution to  
247 community-level functions than the other members<sup>6,11,14</sup>. In our system, the 24-member  
248 community lacking AC exhibited  $1.9\pm 1.0$  mM butyrate (mean $\pm$ s.d.,  $n=8$ ), substantially lower than  
249 any observed complex (>10 species) community containing AC and qualitatively consistent with  
250 our model which predicted no butyrate (**Figure 4b**, **Figure S3b**). Therefore, AC was a driver of  
251 butyrate production in complex communities. There are large interpersonal differences in gut  
252 microbiota composition due to environmental factors and host-microbe interactions<sup>48</sup>. Thus, some  
253 species such as AC may not be present in certain individuals<sup>49</sup>. To evaluate the capability of  
254 our model to steer systems from low to high butyrate producing states independent of the  
255 presence of particular species, we designed high butyrate producing complex communities  
256 lacking the driver species AC.

257 To do so, we used model M2 to simulate all communities containing the four butyrate  
258 producers excluding AC (1,048,575 communities) to forecast species abundance and butyrate  
259 production. Similar to the 5 butyrate-producer case, we used the 24-member community lacking  
260 AC as a reference frame for quantifying deviations from a potential compositional attractor. While  
261 most communities were predicted to have low butyrate production, butyrate production increased  
262 with the distance from the 24-member community (**Figure 4b**). To explore this design space and  
263 evaluate whether our model could identify communities with low or high butyrate activity, we  
264 experimentally assembled 84 communities containing 11-19 members that were predicted to  
265 display a broad range of butyrate production capabilities (**Figure 4b**). Mirroring our model  
266 prediction, distance from the 24-member community in species composition was positively  
267 correlated with butyrate production (Spearman  $\rho=0.56$ ,  $p=3*10^{-8}$ ) as well as butyrate producer  
268 abundance (Spearman  $\rho=0.85$ ,  $p=1*10^{-24}$ ) (**Figure 4b**, inset). However, the model substantially  
269 overpredicted butyrate production (**Figure 4d**). Therefore, we sought to continue the DTL  
270 paradigm by training our model on the new data.

#### 271 *Updated model predicts butyrate production in high complexity communities*

272 The discrepancies between our model predictions and experimental measurements in complex  
273 communities were either due to missing information about certain pairwise interactions (i.e. poor  
274 parameter estimates due to unobservable interactions) or higher-order interactions that could not  
275 be captured by our pairwise model (i.e. model structure fails to represent system behaviors). To  
276 distinguish between these possibilities, we updated our model by training on a subset of high-  
277 complexity communities: the random set of communities containing all butyrate producers (82  
278 communities) and a randomly sampled half of the communities lacking AC (42 communities)  
279 (**Figure 4a-d**). Notably, the updated model M3 predicted the measurements of high-complexity  
280 communities with high accuracy, demonstrating that the pairwise model structures could explain  
281 the quantitative trends in the data when provided with sufficient information (**Figure 4e**). The  
282 predictive capability of the model required information from complex communities, supporting  
283 recent theoretical work suggesting that the typical pairwise community experimental design may  
284 not be the most efficient for building predictive models of complex systems<sup>26</sup>.

285 We next examined the changes in the inferred parameters between models M2 and M3  
286 to provide insights into key microbial interactions impacting complex community behaviors. The  
287 major changes in the updated gLV M3 model were new values for all previously unobserved  
288 pairwise interactions as well as modification of previously observed interaction parameters  
289 (**Figure 4f**, **Figure S2f**). Negative interactions ( $<-0.05$  hr<sup>-1</sup> (OD<sub>600</sub> Species j)<sup>-1</sup>) dominated the

290 network, representing 49.8% of the interspecies interaction parameters. By contrast, only 1.7%  
291 of interactions were strong positive ( $>0.05 \text{ hr}^{-1} (\text{OD}_{600} \text{ Species } j)^{-1}$ ), consistent with previous  
292 observations of the prevalence of negative interactions in microbial communities<sup>6,50</sup>. Notably, 70%  
293 of the previously observed interspecies interaction parameters fell within the 60% confidence  
294 interval of the posterior distribution for model M2, demonstrating that our M2 model was accurate  
295 but lacked sufficient information to be highly confident in the estimated parameter values.

296 In the updated gLV model, species which secreted lactate in monoculture tended to have  
297 a positive impact on the growth of AC (**Figure 4f**). Although DP is also a lactate consumer<sup>47</sup>, it  
298 did not tend to benefit from monospecies lactate producers. This result highlights the benefits of  
299 using data from multiple levels of community complexity for training gLV models as these  
300 interactions were not captured by models M1 and M2, trained only on lower-order community  
301 contexts. To understand how inter-species interactions vary across chemical composition  
302 contexts, we compared the inferred inter-species interaction coefficients in the M3 gLV model to  
303 those from a previous study that used a gLV model to study a 12-member subset of our  
304 community (PC, BV, BO, BT, BU, DP, CA, EL, FP, CH, BH, and ER) in a different (rich) media<sup>6</sup>  
305 and found that 27 parameters with magnitude  $>0.1 \text{ hr}^{-1} (\text{OD}_{600} \text{ species } j)^{-1}$  shared a sign and only  
306 5 had opposite sign (**Figure 4f**). The high percentage (84%) of qualitatively consistent interaction  
307 coefficients inferred based on measurements in two different environmental contexts provides  
308 confidence in using parameterized gLV models as prior information to forecast system behaviors  
309 in new environments.

310 The regression model from M3 identified three interactions driving complementarity effects  
311 in the 5 butyrate producer communities including *Eggerthella lenta* (EL)-AC, DP-AC, and *Dorea*  
312 *formicigenerans* (DF)-RI (**Figure 4g**). In the absence of AC, substantial complementarity effects  
313 were not detected (**Figure 4g**), consistent with the absence of strong complementarity effects in  
314 lower-complexity communities lacking AC. In our system, AC has the unique capability to  
315 transform lactate to butyrate in addition to production of butyrate from sugars (**Figure 2b**),  
316 suggesting that metabolic flexibility may be a key determinant of complementarity effects. In sum,  
317 our modeling framework representing pairwise interactions could accurately predict community  
318 composition and butyrate production in complex communities and could be used to decipher key  
319 microbial interactions impacting metabolic outputs.

### 320 *Mechanistic insights identified from inferred interaction networks*

321 We sought to analyze the patterns in our inferred interactions to identify mechanistic hypotheses  
322 about the potential ecological and molecular factors driving butyrate production. The low butyrate  
323 productivity of specific communities could stem from a global reduction in metabolic activities for  
324 the conversion of sugars to organic acid fermentation products. However, the amount of total  
325 carbon in acetate, lactate, and propionate was inversely proportional to the amount of carbon in  
326 butyrate in complex communities (**Figure S4**), indicating that metabolic tradeoffs dictated the  
327 production of specific organic acids. Therefore, we considered how interactions identified by our  
328 model could influence such tradeoffs.

329 We analyzed the inferred interaction networks to provide generalizable insights into  
330 metabolic processes impacting butyrate production in our system. We first considered the largest  
331 negative complementarity effect in our system between AC and DP (**Figure 4g**). While these two  
332 species have previously been shown to compete for lactate *in vitro*<sup>51</sup>, excess lactate was present  
333 in communities containing both DP and AC, suggesting that competition over limited lactate was  
334 not a major determinant of the negative complementarity effect (**Figure 5a**). In addition, a large  
335 negative complementarity effect was observed in the 3-5 member communities between DP and  
336 CC, which does not utilize lactate for butyrate production (**Figure 3d**).

337 Since some *Desulfovibrio* species have the capability to use butyrate as an energy  
338 source<sup>52</sup>, we tested whether decreased butyrate in the presence of DP could be due to butyrate



339 consumption. To investigate this hypothesis, we grew DP in media supplemented with different  
340 concentrations of sodium butyrate ranging between 0 and 100 mM and measured the butyrate  
341 concentration after 48 hours of incubation. The presence of DP did not alter the concentration of  
342 butyrate in any condition, suggesting that decreased butyrate due to consumption or degradation  
343 was not a major factor contributing to the negative complementarity effects associated with DP  
344 (**Figure S5**). One unique metabolic characteristic of DP in our system is the capability to reduce  
345 sulfate to hydrogen sulfide (H<sub>2</sub>S). Therefore, we hypothesized that H<sub>2</sub>S may contribute the  
346 negative impact of DP on butyrate production (**Figure 4a**). To test this hypothesis, each butyrate  
347 producer was grown in media supplemented with a range of sulfide concentrations. Notably, the  
348 butyrate production per unit biomass decreased with increasing sulfide concentration for all  
349 butyrate producers (**Figure 5b**). These data suggest that the levels of H<sub>2</sub>S produced by the host  
350 and constituent members of gut microbiota could shape butyrate production in the human gut  
351 microbiome.

352 We next investigated the factors that contribute to strong positive complementarity  
353 interactions influencing AC from EL or DF in complex communities with all butyrate producers  
354 (**Figure 4f**). Butyrate concentration exhibited a strong negative correlation with lactate  
355 concentration in complex communities (**Figure 5a**). Based on this correlation, we hypothesized  
356 that communities with higher butyrate concentration than expected based on monoculture  
357 butyrate yield (i.e. total positive butyrate complementarity) would exhibit lower lactate  
358 concentration than expected based on monoculture lactate yield (i.e. total negative lactate  
359 complementarity) (**Methods**). Our results demonstrated a negative correlation between butyrate  
360 and lactate complementarity in communities with AC, but not in communities without AC (**Figure**  
361 **5a**, inset). These results suggest that the majority of excess butyrate that was not predicted based  
362 on monospecies butyrate yield was attributed to conversion of lactate to butyrate by AC,  
363 suggesting that this metabolic mode for butyrate production was driving the inferred  
364 complementarity effects. Thus, we next considered potential environmental factors that could  
365 inhibit the conversion of lactate to butyrate.

366 Previous studies have shown that the environmental pH has a major impact on organic  
367 acid production by gut microbiota<sup>53–56</sup>. For example, in batch cultures of fecal inocula,  
368 supplemented lactate was converted entirely to butyrate, propionate, and acetate at pH 5.9 and  
369 6.4, but not at pH 5.2. This abrupt metabolic shift at low environmental pH was attributed to  
370 inhibition of lactate consumption by AC and *E. hallii* (a closely related lactate-consuming butyrate  
371 producer in the clostridial cluster XIVa)<sup>55</sup>. Consistent with these results, butyrate concentration  
372 and pH were positively correlated in complex communities with AC (Spearman rho=0.73,  
373 p=1\*10<sup>-57</sup>) or without AC (Spearman rho=0.29, p=1\*10<sup>-4</sup>), though the correlation was much  
374 stronger in communities with AC (**Figure 5c**). A positive correlation between butyrate and pH  
375 could be attributed to reduced acidification of the media on a per carbon basis because one  
376 butyrate molecule is produced from (or as an alternative to) two acetate molecules (**Figure 2b**).  
377 However, we postulate that in the presence of AC, a different mechanism drives the substantially  
378 stronger correlation between pH and butyrate, wherein high butyrate production was enabled by  
379 an environmental pH maintained above 5.9 (below which lactate conversion to butyrate by AC  
380 was inhibited<sup>55</sup>) (**Figure 5c**).

381 The abundance of EL and DF were both positively correlated with pH (**Figure S6**) and had  
382 positive complementarity effects in the regression model (**Figure 4g**), consistent with the potential  
383 role of pH in mediating positive complementarity effects. Further, EL had a unique environmental  
384 impact by increasing the pH in monoculture, suggesting that this mechanism could contribute to  
385 the inferred positive complementarity effect towards butyrate production (**Figure S6**). The  
386 environmental pH for monospecies did not forecast the correlations between species abundance  
387 and pH in complex communities. For example, *Dorea longicatena* (DL) and *Dorea*  
388 *formicigenerans* (DF) strongly acidify the media in monoculture but are positively correlated with  
389 pH in complex communities (**Figure S6**), highlighting a challenging problem in relating species

390 composition to broad functions such as environmental pH modifications across community  
391 contexts.

392 In sum, we postulate that transformation of lactate into butyrate by AC was controlled by  
393 a combination of pH modification and resource competition (**Figure 5d**). Based on this  
394 mechanism, AC can switch between low and high butyrate producing states depending on the  
395 environmental pH and availability of sugars. In communities containing pH buffering species such  
396 as EL that maintain the pH above the threshold, the butyrate yield per biomass is dependent on  
397 the strength of competition for limited pools of sugars (high growth, low butyrate yield state). After  
398 sugars have been depleted, AC switches to a low growth and high butyrate yield metabolic state  
399 that transforms lactate into butyrate. The timing of the AC metabolic switch depends on the  
400 strength of resource competition in the community. In low pH environments, transformation of  
401 lactate to butyrate is inhibited and thus AC competes for limited sugars, resulting in butyrate  
402 production that is proportional to growth (i.e. no complementarity effects). Corroborating this  
403 notion, lactate-utilizing butyrate producers, including AC, have been shown to prefer glucose over  
404 lactate and produce ~5x more butyrate per unit biomass when grown on lactate versus glucose<sup>39</sup>.  
405 Consistent with the proposed mechanism, the abundance of AC was negatively correlated with  
406 butyrate in conditions with an endpoint pH > 6 (**Figure S7**). Above this pH threshold, there exists  
407 a tradeoff between the biomass of AC and butyrate production depending on the proportion of AC  
408 biomass derived from sugars (i.e. high biomass, low butyrate) or lactate (i.e. low biomass, high  
409 butyrate) (**Figure 5d**). In sum, the proposed mechanism indicates that in a pH buffered  
410 community, resource competition over energy rich nutrients could enhance butyrate production  
411 by AC by triggering a shift in metabolism from a low to high butyrate producing state. Further, this  
412 hypothesis may explain why positive butyrate complementarity effects from pH-buffering species  
413 were not captured by the M1 and M2 models trained on lower-order communities as there were  
414 fewer species and thus a reduced strength of resource competition. This analysis highlights that  
415 an interpretable statistical model that maps community composition to function can provide key  
416 biological insights into ecological and molecular mechanisms driving community functions and  
417 illuminates key metabolic modes of ecological drivers of community functions.

## 418 **DISCUSSION**

419 We demonstrated that community-level functions can be designed using a modeling framework  
420 that predicts community assembly (selection effects) and then maps community composition to  
421 function (complementarity effects). Our results showed that the capability for butyrate production  
422 can vary over a broad range (0-20 mM or 10-60 mM butyrate in the absence and presence of AC,  
423 respectively) by manipulating the presence/absence of diverse non-butyrate producing species,  
424 highlighting the critical role of microbial interactions in community-level functions. We used a DTL  
425 cycle to develop a predictive model of butyrate production by synthetic human gut microbiome  
426 communities which enabled the identification of key microbial interactions and insights into  
427 potential molecular mechanisms driving butyrate production. Our results demonstrated that  
428 accurate prediction of community function in complex multi-member consortia (i.e. >10 species)  
429 required measurements of communities at similar levels of complexity. Thus, the predictive  
430 capability of computational models of microbial communities could be improved by choosing  
431 communities that span the range of complexities of interest, rather than implementing a standard  
432 procedure of characterizing pairwise communities<sup>6,14,42</sup>. Consistent with this proposed  
433 experimental design approach, recent theoretical work has demonstrated a similar perspective<sup>26</sup>.

434 While our approach lacks a host-interaction component, the mechanistic nature of insights  
435 derived from our model will enable future work to adapt our pipeline to predict community-level  
436 functions in the mammalian gut environment. For instance, DP has been previously associated  
437 with IBD<sup>57</sup>, attributed to its H<sub>2</sub>S activity inhibiting oxidation of short chain fatty acids by the host  
438 via short-chain acyl-CoA dehydrogenase<sup>58</sup>. However, an additional mechanism through which

439 hydrogen sulfide producers could contribute to IBD is by inhibiting microbial production of the anti-  
440 inflammatory metabolite butyrate via the analogous bacterial short-chain acyl-CoA  
441 dehydrogenase. Indeed, a previous study demonstrated that cecal contents of gnotobiotic mice  
442 colonized with an 8-member community plus DP contained less propionate and elevated 3-  
443 hydroxybutyrate (upstream intermediate of butyrate production) compared to the 8-member  
444 community alone. In this study, the butyrate concentration did not vary between conditions, which  
445 could have been masked by host butyrate consumption as the concentration was very low for  
446 both communities ( $<1$  mM)<sup>47</sup>. This could be explained by H<sub>2</sub>S inhibition of bacterial short chain  
447 acyl-CoA dehydrogenases in butyrate and propionate metabolic pathways, observed as  
448 accumulation of 3-hydroxybutyrate in the former case and decreased propionate production in  
449 the latter. Additionally, this mechanistic insight could explain associations between colitis and  
450 other sulfur-reducing bacteria, such as *Bilophila wadsworthia*<sup>59</sup>, which has been shown to be  
451 associated with reduced expression of microbial butyrate synthesis pathways in a mouse model  
452 of colitis<sup>60</sup>.

453 A major strategy for microbiome modulation involves administration of non-resident  
454 species predicted to perform a target beneficial function<sup>61</sup>, including butyrate-producing bacteria<sup>32</sup>.  
455 Due to the plasticity of microbial metabolism, our results demonstrate that it is important to  
456 consider both how the resident community will enable growth of supplemented butyrate-producing  
457 bacteria as well as promote the desired metabolic states. Indeed, our results showed that in the  
458 presence of AC, the abundance of functional strains may not correlate with community-level  
459 metabolic functions due to complementarity effects that modify microbial metabolic modes.

460 More broadly, our work provides a foundation for implementing model-guided procedures  
461 to design community properties and guide development of ecological and mechanistic hypotheses  
462 for a wide range of applications. Simple modifications can be made to this framework to  
463 accommodate different observed system behaviors. For instance, we modeled our system using  
464 two models incorporating only pairwise interaction terms. While this provided a high level of  
465 interpretability, it has a limited flexibility for studying higher-order interactions, which may play a  
466 critical role in shaping microbiome properties. Additionally, we focused on a predicting single  
467 function, whereas designing communities for multifunctionality may be desirable in many cases.  
468 Both of these limitations could be addressed by modifying our approach using alternative growth  
469 and function models, leveraging advances in machine learning<sup>62</sup> or integrating information from  
470 genome-scale metabolic models<sup>13</sup>.

471 In this work, we constructed models of community dynamics and function in a single  
472 media. The gut microbiome is exposed to a wide range of dietary substrates and the temporal  
473 changes in resource availability can dramatically shape community composition<sup>63</sup>. Our approach  
474 could be adapted to represent the molecular environment as a design variable to allow  
475 simultaneous exploration of the community and chemical composition design spaces to better  
476 understand how the molecular environment shapes microbial community functions. In sum, our  
477 methods provide a flexible foundation to explore design strategies for building microbial  
478 communities with target functions from the bottom-up and to understand molecular and ecological  
479 mechanisms influencing community-level functions.

## 480 **METHODS**

### 481 *Strain Maintenance and Culturing*

482 All anaerobic culturing was carried out in an anaerobic chamber with an atmosphere of  $2.5 \pm 0.5\%$   
483 H<sub>2</sub>,  $15 \pm 1\%$  CO<sub>2</sub> and balance N<sub>2</sub>. All prepared media and materials were placed in the chamber at  
484 least overnight before use to equilibrate with the chamber atmosphere. The strains used in this  
485 work were obtained from the sources listed in **Table S2** and permanent stocks of each were  
486 stored in 25% glycerol at  $-80^{\circ}\text{C}$ . Batches of single-use glycerol stocks were produced for each

487 strain by first growing a culture from the permanent stock in anaerobic basal broth (ABB) media  
488 (HiMedia or Oxoid) to stationary phase, mixing the culture in an equal volume of 50% glycerol,  
489 and aliquoting 400  $\mu\text{L}$  into Matrix Tubes (ThermoFisher) for storage at  $-80^{\circ}\text{C}$ . Quality control for  
490 each batch of single-use glycerol stocks included (1) plating a sample of the aliquoted mixture  
491 onto LB media (Sigma-Aldrich) for incubation at  $37^{\circ}\text{C}$  in ambient air to detect aerobic  
492 contaminants and (2) Illumina sequencing of 16S rDNA isolated from pellets of the aliquoted  
493 mixture to verify the identity of the organism. For each experiment, precultures of each species  
494 were prepared by thawing a single-use glycerol stock and combining the inoculation volume and  
495 media listed in **Table S2** to a total volume of 5 mL (multiple tubes inoculated if more preculture  
496 volume needed) for stationary incubation at  $37^{\circ}\text{C}$  for the preculture incubation time listed in **Table**  
497 **S2**. All experiments were performed in a chemically defined medium (DM38), the composition of  
498 which is provided in **Table S3**.

#### 499 *Monoculture Dynamic Growth Quantification*

500 Each species' preculture was diluted to an  $\text{OD}_{600}$  of 0.0066 (Tecan F200 Plate Reader, 200  $\mu\text{L}$  in  
501 96-Well Microplate) in DM38 and aliquoted into 3 replicates of 1 mL each in a 96 Deep Well  
502 (96DW) plate and covered with a semi-permeable membrane (Diversified Biotech) for stationary  
503 incubation at  $37^{\circ}\text{C}$ . At each time point, samples were mixed and  $\text{OD}_{600}$  was measured by diluting  
504 an aliquot of each sample into phosphate-buffered saline (PBS) into the linear range of the plate  
505 reader.

#### 506 *Community Culturing Experiments and Sample Collection*

507 To produce all desired community combinations, each species' preculture was diluted to an  $\text{OD}_{600}$   
508 of 0.0066 in DM38. Community combinations were arrayed in 96DW plates by pipetting equal  
509 volumes of each species' diluted preculture into the appropriate wells using a Tecan Evo Liquid  
510 Handling Robot inside an anaerobic chamber. Each 96DW plate was covered with a semi-  
511 permeable membrane and incubated at  $37^{\circ}\text{C}$ . After 48 hours, 96DW plates were removed from  
512 the incubator and samples were mixed. Cell density was measured by pipetting 200  $\mu\text{L}$  of each  
513 sample into one microplate and diluting 20  $\mu\text{L}$  of each sample into 180  $\mu\text{L}$  of PBS in another  
514 microplate and measuring the  $\text{OD}_{600}$  of both plates (Tecan F200 Plate Reader). We selected the  
515 value that was within the linear range of the instrument for each sample. 200  $\mu\text{L}$  of each sample  
516 was transferred to a new 96DW plate and pelleted by centrifugation at  $2400\times g$  for 10 minutes. A  
517 supernatant volume of 180  $\mu\text{L}$  was removed from each sample and transferred to a 96-well  
518 microplate for storage at  $-20^{\circ}\text{C}$  and subsequent metabolite quantification by high performance  
519 liquid chromatography (HPLC). Cell pellets were stored at  $-80^{\circ}\text{C}$  for subsequent genomic DNA  
520 extraction and 16S rDNA library preparation for Illumina sequencing. In some experiments, 20  $\mu\text{L}$   
521 of each supernatant was used to quantify pH using a phenol Red assay<sup>64</sup>. Phenol red solution  
522 was diluted to 0.005% weight per volume in 0.9% w/v NaCl. Bacterial supernatant (20  $\mu\text{L}$ ) was  
523 added to 180  $\mu\text{L}$  of phenol red solution, and absorbance was measured at 560 nm (Tecan Spark  
524 Plate Reader). A standard curve was produced by fitting the Henderson-Hasselbach equation to  
525 fresh media with a pH ranging between 3 to 11 measured using a standard electro-chemical pH  
526 probe (Mettler-Toledo). We used the following equation to map the pH values to the absorbance  
527 measurements.

$$528 \quad \text{pH} = \text{p}K_a + b \cdot \log_{10} \left( \frac{A - A_{\min}}{A_{\max} - A} \right)$$

529  
530 The parameters  $b$  and  $\text{p}K_a$  were determined using a linear regression between pH and the log  
531 term for the standards in the linear range of absorbance (pH between 5.2 and 11) with  $A_{\max}$   
532 representing the absorbance of the pH 11 standard,  $A_{\min}$  denoting the absorbance of the pH 3  
533 standard and  $A$  representing the absorbance of each condition.

### 534 *Sulfide Titration Experiment*

535 Each species' preculture was diluted to an OD<sub>600</sub> of 0.0066 in DM38. FP cultures were  
536 supplemented with 1 g/L bacto yeast extract (BD) and 33 mM sodium acetate (Sigma Aldrich).  
537 Different volumes of a concentrated solution of sodium sulfide (Alfa Aesar) were added to the  
538 cultures to achieve the desired concentration and the cultures were incubated in capped 1.6 mL  
539 microfuge tubes for 24 hours at which point the OD<sub>600</sub> was measured (Tecan F200 Plate Reader,  
540 200 uL in 96-Well Microplate) and supernatants were collected for organic acid quantification via  
541 HPLC. Sulfide concentrations in the initial cultures were measured via the Cline assay<sup>65</sup> to  
542 account for degradation of the sulfide stock during experimental setup. Briefly, 14.8 uL of Cline  
543 reagent was added to 185.2 uL of culture supernatant and incubated in a sealed 96-Well  
544 Microplate for 2 hours before diluting in 1% zinc acetate (Fisher) to the linear range of absorbance  
545 measurement at 667 nm (Tecan Spark Plate Reader). A standard curve was prepared similarly  
546 using sodium sulfide fixed in 1% zinc acetate. Cline reagent was prepared by dissolving 1.6 g  
547 N,N-dimethyl-p-phenylenediamine sulfate (Acros Organics) and 2.4 g FeCl<sub>3</sub> (Fisher) in 100 mL  
548 50% v/v HCl (Fisher) in water.

### 549 *HPLC Quantification of Organic Acids*

550 Supernatant samples were thawed in a room temperature water bath before addition of 2 μL of  
551 H<sub>2</sub>SO<sub>4</sub> to precipitate any components that might be incompatible with the running buffer. The  
552 samples were then centrifuged at 2400xg for 10 minutes and then 150 μL of each sample was  
553 filtered through a 0.2 μm filter using a vacuum manifold before transferring 70 μL of each sample  
554 to an HPLC vial. HPLC analysis was performed using either a ThermoFisher (Waltham, MA)  
555 Ultimate 3000 UHPLC system equipped with a UV detector (210 nm) or a Shimadzu HPLC system  
556 equipped with a SPD-20AV UV detector (210 nm). Compounds were separated on a 250 x 4.6  
557 mm Rezex® ROA-Organic acid LC column (Phenomenex Torrance, CA) run with a flow rate of  
558 0.2 ml min<sup>-1</sup> and at a column temperature of 50°C. The samples were held at 4°C prior to injection.  
559 Separation was isocratic with a mobile phase of HPLC grade water acidified with 0.015 N H<sub>2</sub>SO<sub>4</sub>  
560 (415 μL L<sup>-1</sup>). At least two standard sets were run along with each sample set. Standards were  
561 100, 20, and 4 mM concentrations of butyrate, succinate, lactate, and acetate, respectively. For  
562 most runs, the injection volume for both sample and standard was 25 μl. The resultant data was  
563 analyzed using the Thermofisher Chromeleon 7 software package.

### 564 *Genomic DNA Extraction and Sequencing Library Preparation*

565 Genomic DNA was extracted from cell pellets using a modified version of the Qiagen DNeasy  
566 Blood and Tissue Kit protocol. First, pellets in 96DW plates were removed from -80°C and thawed  
567 in a room temperature water bath. Each pellet was resuspended by pipette in 180 μL of enzymatic  
568 lysis buffer (20 mM Tris-HCl (Invitrogen), 2 mM Sodium EDTA (Sigma-Aldrich), 1.2% Triton X-  
569 100 (Sigma-Aldrich), 20 mg/mL Lysozyme from chicken egg white (Sigma-Aldrich)). Plates were  
570 then covered with a foil seal and incubated at 37°C for 30 minutes with orbital shaking at 600  
571 RPM. Then, 25 μL of 20 mg mL<sup>-1</sup> Proteinase K (VWR) and 200 μL of Buffer AL (QIAGEN) were  
572 added to each sample before mixing with a pipette. Plates were then covered by a foil seal and  
573 incubated at 56°C for 30 minutes with orbital shaking at 600 RPM. Next, 200 μL of 100% ethanol  
574 (Koptec) was added to each sample before mixing and samples were transferred to a Nucleic  
575 Acid Binding (NAB) plate (Pall) on a vacuum manifold with a 96DW collection plate. Each well in  
576 the NAB plate was then washed once with 500 uL Buffer AW1 (QIAGEN) and once with 500 μL  
577 of Buffer AW2 (QIAGEN). A vacuum was applied to the Pall NAB plate for an additional 10 minutes  
578 to remove any excess ethanol. Samples were then eluted into a clean 96DW plate from each well  
579 using 110 μL of Buffer AE (QIAGEN) preheated to 56°C. Genomic DNA samples were stored at  
580 -20°C until further processing.

581 Genomic DNA concentrations were measured using a SYBR Green fluorescence assay  
582 and then normalized to a concentration of  $1 \text{ ng } \mu\text{L}^{-1}$  by diluting in molecular grade water using a  
583 Tecan Evo Liquid Handling Robot. First, genomic DNA samples were removed from  $-20^{\circ}\text{C}$  and  
584 thawed in a room temperature water bath. Then,  $1 \mu\text{L}$  of each sample was combined with  $95 \mu\text{L}$   
585 of SYBR Green (Invitrogen) diluted by a factor of 100 in TE Buffer (Integrated DNA Technologies)  
586 in a black 384-well microplate. This process was repeated with two replicates of each DNA  
587 standard with concentrations of 0, 0.5, 1, 2, 4, and  $6 \text{ ng } \mu\text{L}^{-1}$ . Each sample was then measured  
588 for fluorescence with an excitation/emission of 485/535 nm using a Tecan Spark plate reader.  
589 Concentrations of each sample were calculated using the standard curve and a custom Python  
590 script was used to compute the dilution factors and write a worklist for the Tecan Evo Liquid  
591 Handling Robot to normalize each sample to  $1 \text{ ng } \mu\text{L}^{-1}$  in molecular grade water. Samples with  
592 DNA concentration less than  $1 \text{ ng } \mu\text{L}^{-1}$  were not diluted. Diluted genomic DNA samples were  
593 stored at  $-20^{\circ}\text{C}$  until further processing.

594 Amplicon libraries were generated from diluted genomic DNA samples by PCR  
595 amplification of the V3-V4 of the 16S rRNA gene using custom dual-indexed primers (**Table S3**)  
596 for multiplexed next generation amplicon sequencing on Illumina platforms (Method adapted from  
597 Venturelli et al. *Mol. Sys. Bio.*, 2018). Primers were arrayed in skirted 96 well PCR plates (VWR)  
598 using an acoustic liquid handling robot (Labcyte Echo 550) such that each well received a different  
599 combination of one forward and one reverse primer ( $0.1 \mu\text{L}$  of each). After liquid evaporated, dry  
600 primers were stored at  $-20^{\circ}\text{C}$ . Primers were resuspended in  $15 \mu\text{L}$  PCR master mix ( $0.2 \mu\text{L}$   
601 Phusion High Fidelity DNA Polymerase (Thermo Scientific),  $0.4 \mu\text{L}$  10 mM dNTP Solution (New  
602 England Biolabs),  $4 \mu\text{L}$  5x Phusion HF Buffer (Thermo Scientific),  $4 \mu\text{L}$  5M Betaine (Sigma-  
603 Aldrich),  $6.4 \mu\text{L}$  Water) and  $5 \mu\text{L}$  of normalized genomic DNA to give a final concentration of  $0.05$   
604  $\mu\text{M}$  of each primer. Primer plates were sealed with Microplate B seals (Bio-Rad) and PCR was  
605 performed using a Bio-Rad C1000 Thermal Cycler with the following program: initial denaturation  
606 at  $98^{\circ}\text{C}$  (30 s); 25 cycles of denaturation at  $98^{\circ}\text{C}$  (10 s), annealing at  $60^{\circ}\text{C}$  (30 s), extension at  
607  $72^{\circ}\text{C}$  (60 s); and final extension at  $72^{\circ}\text{C}$  (10 minutes).  $2 \mu\text{L}$  of PCR products from each well were  
608 pooled and purified using the DNA Clean & Concentrator (Zymo) and eluted in water. The  
609 resulting libraries were sequenced on an Illumina MiSeq using a MiSeq Reagent Kit v3 (600-  
610 cycle) to generate 2x300 paired end reads.

### 611 *Bioinformatic Analysis for Quantification of Species Abundance*

612 Sequencing data were demultiplexed using Basespace Sequencing Hub's FastQ Generation  
613 program. Custom python scripts were used for further data processing (Method adapted from  
614 Venturelli et al. *Mol. Sys. Bio.*, 2018)<sup>66</sup>. Paired end reads were merged using PEAR (v0.9.10)<sup>66</sup>  
615 after which reads without forward and reverse annealing regions were filtered out. A reference  
616 database of the V3-V5 16S rRNA gene sequences was created using consensus sequences from  
617 next-generation sequencing data or Sanger sequencing data of monospecies cultures.  
618 Sequences were mapped to the reference database using the mothur (v1.40.5)<sup>67</sup> command  
619 classify.seqs (Wang method with a bootstrap cutoff value of 60). Relative abundance was  
620 calculated as the read count mapped to each species divided by the total number of reads for  
621 each condition. Absolute abundance of each species was calculated by multiplying the relative  
622 abundance by the  $\text{OD}_{600}$  measurement for each sample. Samples were excluded from further  
623 analysis if they had  $\text{OD}_{600} > 0.1$  and they had less than 1000 total reads or  $> 1\%$  of the reads were  
624 assigned to a species not expected to be in the community.

### 625 *Model-Free Quantification of Complementarity*

626 We quantified the contribution of complementarity effects to butyrate and lactate production in  
627 each community by calculating the difference between the measured metabolite concentration

628 and the expected metabolite concentration based on monoculture yield according to the following  
629 equation:

630

631 
$$\text{Complementarity of } M_k = [M_k]_{\text{Community}} - \sum_{i \in \text{Species}} \frac{[M_k]_{\text{Monoculture } i}}{X_{i, \text{Monoculture}}} X_{i, \text{Community}}$$

632

633 The variables  $M_k$  represents metabolite  $k$  (e.g. butyrate or lactate),  $[M_k]_{\text{Community}}$  represents the  
634 concentration of metabolite  $k$  measured in the community,  $[M_k]_{\text{Monoculture } i}$  denotes the  
635 concentration of metabolite  $k$  in the monoculture of species  $i$ ,  $X_{i, \text{Monoculture}}$  represents the  
636 absolute abundance of species  $i$  in monoculture,  $X_{i, \text{Community}}$  is the absolute abundance of  
637 species  $i$  in the community, and the summation is across all species in the community.

### 638 *gLV Models and Training*

639 We used a model with two modules: the gLV model to predict composition of the assembled  
640 community and a regression model with interaction terms to predict butyrate production as a  
641 function of the predicted community composition (**Figure 1a**). The gLV model is a set of  $N$  coupled  
642 first-order ordinary differential equations, where  $N$  denotes the number of species, of the form:

643

644 
$$\frac{1}{X_i} \frac{dX_i}{dt} = r_i + \sum_{j=1}^N a_{ij} X_j$$

645

646 The species  $X_i$  is the abundance of species  $i$ ,  $r_i$  is a parameter that represents the basal growth  
647 rate of species  $i$ , and  $a_{ij}$  is a parameter that represents interactions by modifying the growth rate  
648 of species  $i$  proportional to the abundance of species  $j$ . To prevent unbounded growth,  $a_{ij}$  is  
649 constrained to be negative when  $i=j$ , representing intra-species competition. This model has  
650 previously been used to understand and predict the behavior of complex microbial communities<sup>6</sup>  
651 and provides an interpretable model form (e.g. which interspecies interactions are important)  
652 without introducing an excessive number of parameters (e.g. complex mechanistic models<sup>68</sup>).

653 We used a Bayesian parameter inference approach to estimate parameters for the gLV  
654 model from experimental measurements (adapted from Shin et al., *PLoS Computational Biology*,  
655 2019<sup>30</sup>). Briefly, our method has a prior distribution for each model parameter and then varies the  
656 parameters to fit the model to the measured species abundances (mean of biological replicates)  
657 while penalizing deviations from the parameter prior distributions. These penalties provide a  
658 regularization effect, which is necessary when the model is underdetermined. We used L2  
659 regularization because we expected inter-species competition to be prevalent and thus did not  
660 expect many interaction parameters to be negligible. After an optimal parameter set is found, this  
661 process is repeated hundreds of times after applying random noise to the experimental data  
662 proportional to the measured experimental variance to generate an ensemble of parameter sets  
663 (i.e. the posterior distribution). This posterior distribution is then used as the prior distribution when  
664 updating the model with new data. We adapted a previous implementation of this method in Julia  
665 for this work.

666 Before training the model on any data, we assumed a normally distributed prior for each  
667 parameter with mean of 0 and standard deviation equal to 1. We then trained the gLV model on  
668 time-series measurements of monoculture growth for each species, estimating a posterior  
669 distribution for each  $r_i$  and  $a_{ij}$  parameter (other  $a_{ij}$  posterior distributions were equal to the prior  
670 distribution). We used this posterior distribution as a prior distribution to update the model with  
671 the pairwise community data and generated the gLV module of Model M1, where posterior  
672 distributions were estimated from experimental data for  $r_i$ ,  $a_{ii}$ , and  $a_{ij}$  where species  $i$  and species

673  $j$  co-occurred in the experimental data and the posterior distribution of  $a_{ij}$  for unobserved pairs  
674 was equal to the prior. We similarly updated the model using the 3 to 5-member community  
675 experiments to generate Model M2. Regularization coefficients for each iteration of the model  
676 updating process are shown in **Table S4**.

677 The gLV modules of Models M1 and M2 were underdetermined due to pairs of species  
678 never being observed in the same community within the training dataset. To generate parameters  
679 for these unobserved interactions, we used a matrix imputation approach to estimate the  
680 interaction parameters informed by the phylogenetic relatedness of species. First, we sorted the  
681  $a_{ij}$  interaction parameter matrix such that the rows and columns occurred in the same order as the  
682 phylogenetic tree (**Figure 2a**). Next, we used K-nearest neighbors matrix imputation with  $K = 2$  to  
683 estimate interaction parameters for species that were not observed in the training data  
684 (implemented in Python 3 using the fancyimpute package, <https://pypi.org/project/fancyimpute/>).  
685 This process was repeated independently for each parameter set in the posterior distribution.

686 While the parameter optimization portion of this model-training process had previously  
687 been found to scale with increasing number of pairwise community datasets<sup>30</sup>, we found that the  
688 optimization problem became intractable when attempting to estimate parameters from complex  
689 community data (i.e. >10 species). To address this problem, we used the nonlinear programming  
690 solver FMINCON in MATLAB to generate the gLV module of Model M3 by training on all data  
691 simultaneously. Using this method, the cost function for the optimization algorithm is computed  
692 using an ODE solver to simulate each community and the sum of mean squared errors for the  
693 community is computed and added to a L2 regularization term penalizing the magnitude of the  
694 parameter vector. To ensure that the model did not sacrifice the goodness of fit to the time-series  
695 monospecies data, the mean squared errors for these data were weighted more highly. The  
696 resulting optimization function was as follows:

$$697 \varphi = \sum_{k \in \text{Single}} (X_{exp,k} - X_{model,k})^2 + w \sum_{l \in \text{Dynamic}} (X_{exp,l} - X_{model,l})^2 + \lambda \sum_{j \in \text{Params}} \theta_j^2.$$

698 In this equation, single denotes the set of experiments where only the end point community  
699 composition was measured, dynamic indicates the set of time-series monospecies  
700 measurements,  $w$  is the weighting factor the time-series monospecies measurements, and  $\lambda$   
701 represents the regularization coefficient. The FMINCON function identifies a parameter estimate  
702 which minimizes the cost function. We provided the median parameter values from Model M2 as  
703 an initial guess for the FMINCON function. We repeated this process with various values of  $\lambda$  and  
704  $w$  to find a parameter set that simultaneously fits the Dynamic and Single datasets with maximal  
705 regularization penalty to prevent overfitting to the data (**Table S4**). We used a procedure based  
706 on the one described above for the Julia implementation to generate an ensemble of parameter  
707 sets (i.e. the posterior distribution) using FMINCON. Because each iteration of the FMINCON  
708 parameter estimation took several hours to complete, we massively parallelized the generation of  
709 each of the hundreds of parameter sets in the ensemble using resources from the UW-Madison  
710 Center for High Throughput Computing.

### 713 *Regression Models and Training*

714 We used a regression model to represent a microbial community function with interaction terms:

$$715 B = \sum_{i \in \text{BPB}} \alpha_i \chi_i + \sum_{j \in \text{BPB}} \sum_{k \in \text{ALL}} \beta_{jk} \chi_j \chi_k$$

716 The variable  $B$  is the predicted butyrate concentration,  $\alpha_i$  are parameters corresponding to each  
717 of the variables  $\chi_i$  (end point abundances and time 0 presence or absence (1 or 0) for each  
718 butyrate producer, 10 variables total), and  $\beta_{jk}$  are interaction parameters corresponding to each  
719 butyrate producer, 10 variables total), and  $\beta_{jk}$  are interaction parameters corresponding to each  
720 butyrate producer, 10 variables total).



721 pair of variables  $\chi_j$  (end point abundances and time 0 presence or absence (1 or 0) for each  
722 butyrate producer, 10 variables total) and  $\chi_k$  (end point abundances and time 0 presence or  
723 absence (1 or 0) for all species, 50 variables total), excluding cases where  $\chi_j$  and  $\chi_k$  refer to the  
724 same species (450 total parameters). Model fitting was performed using custom scripts written in  
725 MATLAB and Python. We used L1 regularization to minimize the number of nonzero parameters.  
726 Regularization coefficients were chosen by using 10-fold cross validation and choosing the  
727 coefficient value with the lowest median mean-squared error for the test data. For models M1 and  
728 M2, ensembles of regression models were generated, one for each possible combination of  
729 butyrate producers, where samples containing butyrate producers from outside of each set were  
730 excluded. In this case, butyrate production from less productive species (e.g. FP) were small  
731 compared to more productive species (e.g. AC, ER, RI, CC) thus reducing the model accuracy  
732 for communities lacking the high productivity species. For Model M3, one regression model was  
733 generated using all data because all communities of interest contained highly productive butyrate  
734 producers.

### 735 *Model Simulations to Predict New Communities*

736 Custom MATLAB scripts were used to predict community assembly and butyrate production, for  
737 many communities as described in the text (e.g. all communities containing all 5 butyrate  
738 producers for **Figure 4a**). For each community, the growth dynamics were simulated using each  
739 parameter set from the posterior distribution of the gLV model. The resulting community  
740 compositions for each simulation were an input to the regression model to predict butyrate  
741 concentration. Statistics on the resulting distributions of butyrate concentration and abundance of  
742 each species were stored for later plotting. Because of the large number of communities and the  
743 large number of parameter sets (i.e. hundreds of simulations per community), we used parallel  
744 computing (MATLAB parfor) to complete the simulations in a reasonable timeframe (~4 days for  
745 the communities in **Figure 4a**).

## 746 **ACKNOWLEDGEMENTS**

747 We would like to thank Sungho Shin, Jordan Jalving, and Victor Zavala for their advice related to  
748 implementing Julia parameter estimation methods. In addition, we are grateful to Mayank  
749 Baranwal and Alfred Hero for conversations which inspired the matrix imputation approach for  
750 estimating unobserved interaction parameters. We would like to thank Federico Rey for  
751 generously taking the time to provide advice that improved the manuscript. Research was  
752 sponsored by the National Institutes of Health and was accomplished under Grant Number  
753 R35GM124774 and University of Wisconsin-Madison Office of the Chancellor and Vice  
754 Chancellor for Research and Graduate Education with funding from the Wisconsin Alumni  
755 Research Foundation. S.E.H. was supported by the National Institute of General Medical  
756 Sciences of the National Institutes of Health under Award Number T32GM008349. R.L.C. was  
757 supported in part by an NHGRI training grant to the Genomic Sciences Training Program (T32  
758 HG002760). This research was performed using the computing resources and assistance of the  
759 UW-Madison Center for High Throughput Computing (CHTC) in the Department of Computer  
760 Sciences. The CHTC is supported by UW-Madison, the Advanced Computing Initiative, the  
761 Wisconsin Alumni Research Foundation, the Wisconsin Institutes for Discovery, and the National  
762 Science Foundation, and is an active member of the Open Science Grid, which is supported by  
763 the National Science Foundation and the U.S. Department of Energy's Office of Science.  
764

## 765 AUTHOR CONTRIBUTIONS

766 O.S.V. and R.L.C conceived the study. R.L.C., J.J.H., S.E.H., and B.M.C. carried out the  
767 experiments. R.L.C. implemented computational modeling. R.L.C., S.E.H. and O.S.V. analyzed  
768 the data. B.M.C. proposed inhibition of butyrate production by hydrogen sulfide. D.A.N. and  
769 D.M.S. designed and implemented metabolite measurements. O.S.V. secured funding. R.L.C.  
770 and O.S.V. wrote the paper and all authors provided feedback on the manuscript.

## 771 CONFLICT OF INTEREST

772 The authors do not have a conflict of interest.

## 773 REFERENCES

- 774 1. Thompson, L. R. *et al.* A communal catalogue reveals Earth’s multiscale microbial  
775 diversity. *Nature* **551**, 457–463 (2017).
- 776 2. Moran, M. A. The global ocean microbiome. *Science* (80-. ). **350**, (2015).
- 777 3. Ahmad, F., Ahmad, I. & Khan, M. S. Screening of free-living rhizospheric bacteria for their  
778 multiple plant growth promoting activities. *Microbiol. Res.* **163**, 173–181 (2008).
- 779 4. Flint, H. J., Scott, K. P., Duncan, S. H., Louis, P. & Forano, E. Microbial degradation of  
780 complex carbohydrates in the gut. *Gut Microbes* 289–306 (2012).
- 781 5. Lawson, C. E. *et al.* Common principles and best practices for engineering microbiomes.  
782 *Nat. Rev. Microbiology* (2019). doi:10.1038/s41579-019-0255-9
- 783 6. Venturelli, O. S. *et al.* Deciphering microbial interactions in synthetic human gut  
784 microbiome communities. *Mol. Syst. Biol.* **14**, e8157 (2018).
- 785 7. Friedman, J., Higgins, L. M. & Gore, J. Community structure follows simple assembly  
786 rules in microbial microcosms. *Nat. Ecol. Evol.* **1**, 0109 (2017).
- 787 8. Ratzke, C. & Gore, J. Modifying and reacting to the environmental pH drives bacterial  
788 interactions. *PLoS Biol.* 136838 (2018). doi:10.1101/136838
- 789 9. Abreu, C. I., Friedman, J., Andersen Woltz, V. L. & Gore, J. Mortality causes universal  
790 changes in microbial community composition. *Nat. Commun.* **10**, (2019).
- 791 10. Ratzke, C., Barrere, J. & Gore, J. Strength of species interactions determines biodiversity  
792 and stability in microbial communities. *Nat. Ecol. Evol.* (2020).
- 793 11. Piccardi, P., Vessman, B. & Mitri, S. Toxicity drives facilitation between 4 bacterial  
794 species. *Proc. Natl. Acad. Sci. U. S. A.* **116**, 15979–15984 (2019).
- 795 12. Lax, S., Abreu, C. I. & Gore, J. Higher temperatures generically favour slower-growing  
796 bacterial species in multispecies communities. *Nat. Ecol. Evol.* (2020).
- 797 13. Bauer, E., Zimmermann, J., Baldini, F., Thiele, I. & Kaleta, C. BacArena: Individual-based  
798 metabolic modeling of heterogeneous microbes in complex communities. *PLoS Comput.*  
799 *Biol.* **13**, 1–22 (2017).
- 800 14. Sanchez-Gorostiaga, A., Bajić, D., Osborne, M. L., Poyatos, J. F. & Sanchez, A. High-  
801 order interactions distort the functional landscape of microbial consortia. *PLoS Biol.*  
802 (2019). doi:10.1101/333534
- 803 15. Medlock, G. L. *et al.* Inferring Metabolic Mechanisms of Interaction within a Defined Gut  
804 Microbiota. *Cell Syst.* **7**, 245-257.e7 (2018).
- 805 16. Stein, R. R. *et al.* Computer-guided design of optimal microbial consortia for immune  
806 system modulation. *Elife* **7**, 1–17 (2018).
- 807 17. Rosser, E. C. *et al.* Microbiota-Derived Metabolites Suppress Arthritis by Amplifying Aryl-  
808 Hydrocarbon Receptor Activation in Regulatory B Cells. *Cell Metab.* **31**, 1–15 (2020).
- 809 18. Kimura, I. *et al.* The gut microbiota suppresses insulin-mediated fat accumulation via the  
810 short-chain fatty acid receptor GPR43. *Nat. Commun.* **4**, 1829 (2013).

- 811 19. Li, Z. *et al.* Butyrate reduces appetite and activates brown adipose tissue via the gut-brain  
812 neural circuit. *Gut* Published Online First: 03 November 2017 (2017). doi:10.1136/gutjnl-  
813 2017-314050
- 814 20. Lin, H. V. *et al.* Butyrate and propionate protect against diet-induced obesity and regulate  
815 gut hormones via free fatty acid receptor 3-independent mechanisms. *PLoS One* **7**, 1–9  
816 (2012).
- 817 21. Furusawa, Y. *et al.* Commensal microbe-derived butyrate induces the differentiation of  
818 colonic regulatory T cells. *Nature* **504**, 446–450 (2013).
- 819 22. Segain, J. P. *et al.* Butyrate inhibits inflammatory responses through NFkB inhibition:  
820 implications for Crohn’s disease. *Gut* **47**, 397–403 (2000).
- 821 23. Rivera-Chávez, F. *et al.* Depletion of Butyrate-Producing Clostridia from the Gut  
822 Microbiota Drives an Aerobic Luminal Expansion of Salmonella. *Cell Host Microbe* **19**,  
823 443–454 (2016).
- 824 24. Khan, S., Maremanda, K. P. & Jena, G. Butyrate, a Short-Chain Fatty Acid and Histone  
825 Deacetylases Inhibitor: Nutritional, Physiological, and Pharmacological Aspects in  
826 Diabetes. in *Handbook of Nutrition, Diet, and Epigenetics* 1–15 (Springer International  
827 Publishing, 2017). doi:10.1007/978-3-319-31143-2\_70-1
- 828 25. Fung, K. Y. C., Cosgrove, L., Lockett, T., Head, R. & Topping, D. L. A review of the  
829 potential mechanisms for the lowering of colorectal oncogenesis by butyrate. *Br. J. Nutr.*  
830 **108**, 820–831 (2012).
- 831 26. Maynard, D. S., Miller, Z. R. & Allesina, S. Predicting coexistence in experimental  
832 ecological communities. *Nat. Ecol. Evol.* **4**, 91–100 (2020).
- 833 27. Hector, A. & Loreau, M. Partitioning selection and complementarity in biodiversity  
834 experiments. *Nature* **412**, 72–76 (2001).
- 835 28. Bell, T., Newman, J. A., Silverman, B. W., Turner, S. L. & Lilley, A. K. The contribution of  
836 species richness and composition to bacterial services. *Nature* **436**, 1157–1160 (2005).
- 837 29. Rivett, D. W. & Bell, T. Abundance determines the functional role of bacterial phylotypes  
838 in complex communities. *Nat. Microbiol.* **3**, 767–772 (2018).
- 839 30. Shin, S., Venturelli, O. S. & Zavala, V. M. Scalable nonlinear programming framework for  
840 parameter estimation in dynamic biological system models. *PLoS Comput. Biol.* 1–29  
841 (2019).
- 842 31. Petrof, E. O. & Khoruts, A. From stool transplants to next-generation microbiota  
843 therapeutics. *Gastroenterology* **146**, 1573–1582 (2014).
- 844 32. Glijamse, P. W. *et al.* Treatment with *Anaerobutyricum soehngenii*: a pilot study of safety  
845 and dose–response effects on glucose metabolism in human subjects with metabolic  
846 syndrome. *npj Biofilms Microbiomes* 1–10 (2020). doi:10.1038/s41522-020-0127-0
- 847 33. Vital, M., Howe, A. & Tiedje, J. Revealing the Bacterial Synthesis Pathways by Analyzing  
848 (Meta) Genomic Data. *MBio* **5**, 1–11 (2014).
- 849 34. Lawson, C. E. & Lückner, S. Complete ammonia oxidation: an important control on  
850 nitrification in engineered ecosystems? *Curr. Opin. Biotechnol.* **50**, 158–165 (2018).
- 851 35. Natividad, J. M. *et al.* Impaired Aryl Hydrocarbon Receptor Ligand Production by the Gut  
852 Microbiota Is a Key Factor in Metabolic Syndrome. *Cell Metab.* **28**, 737-749.e4 (2018).
- 853 36. Arif, I., Batool, M. & Schenk, P. M. Plant Microbiome Engineering: Expected Benefits for  
854 Improved Crop Growth and Resilience. *Trends Biotechnol.* 1–12 (2020).  
855 doi:10.1016/j.tibtech.2020.04.015
- 856 37. Forster, S. C. *et al.* A human gut bacterial genome and culture collection for precise and  
857 efficient metagenomic analysis. *Nat. Biotechnol.* **37**, (2019).
- 858 38. Louis, P. & Flint, H. J. Diversity, metabolism and microbial ecology of butyrate-producing  
859 bacteria from the human large intestine. *FEMS Microbiol. Lett.* **294**, 1–8 (2009).
- 860 39. Duncan, S. H., Louis, P. & Flint, H. J. Lactate-Utilizing Bacteria, Isolated from Human  
861 Feces, That Produce Butyrate as a Major Fermentation Product. *Appl. Environ. Microbiol.*

- 862 **70**, 5810–5817 (2004).
- 863 40. Tramontano, M., Andrejev, S., Pruteanu, M. & Klünemann, M. Nutritional preferences of  
864 human gut bacteria reveal their metabolic idiosyncrasies. *Nat. Microbiol.* 4–6 (2018).  
865 doi:10.1038/s41564-018-0123-9
- 866 41. Fort, H. Making quantitative predictions on the yield of a species immersed in a  
867 multispecies community: The focal species method. *Ecol. Modell.* **430**, 109108 (2020).
- 868 42. Kong, W., Meldgin, D. R., Collins, J. J. & Lu, T. Designing microbial consortia with  
869 defined social interactions. *Nat. Chem. Biol.* **14**, 821–829 (2018).
- 870 43. Goldford, J. E. *et al.* Emergent simplicity in microbial community assembly. *Science (80-*  
871 *)*. **361**, 469–474 (2018).
- 872 44. Zmora, N. *et al.* Personalized Gut Mucosal Colonization Resistance to Empiric Probiotics  
873 Is Associated with Unique Host and Microbiome Features. *Cell* **174**, 1388-1405.e21  
874 (2018).
- 875 45. Shade, A. *et al.* Fundamentals of microbial community resistance and resilience. *Front.*  
876 *Microbiol.* **3**, 1–19 (2012).
- 877 46. Bittleston, L. S., Gralka, M., Leventhal, G. E., Mizrahi, I. & Cordero, O. X. Context-  
878 dependent dynamics lead to the assembly of functionally distinct microbial communities.  
879 *Nat. Commun.* **11**, 1440 (2020).
- 880 47. Rey, F. E. *et al.* Metabolic niche of a prominent sulfate-reducing human gut bacterium.  
881 *Proc. Natl. Acad. Sci. U. S. A.* **110**, 13582–7 (2013).
- 882 48. Flint, H. J., Duncan, S. H., Scott, K. P. & Louis, P. Interactions and competition within the  
883 microbial community of the human colon: Links between diet and health. *Environ.*  
884 *Microbiol.* **9**, 1101–1111 (2007).
- 885 49. Vital, M., Karch, A. & Pieper, D. H. Colonic Butyrate-Producing Communities in Humans:  
886 an Overview Using Omics Data. *mSystems* **2**, 1–18 (2017).
- 887 50. Foster, K. R. & Bell, T. Competition, not cooperation, dominates interactions among  
888 culturable microbial species. *Curr. Biol.* **22**, 1845–1850 (2012).
- 889 51. Marquet, P., Duncan, S. H., Chassard, C., Bernalier-Donadille, A. & Flint, H. J. Lactate  
890 has the potential to promote hydrogen sulphide formation in the human colon. *FEMS*  
891 *Microbiol. Lett.* **299**, 128–134 (2009).
- 892 52. Struchtemeyer, C. G., Duncan, K. E. & Mcinerney, M. J. Evidence for syntrophic butyrate  
893 metabolism under sulfate-reducing conditions in a hydrocarbon-contaminated aquifer.  
894 *FEMS Microbiol. Ecol.* **76**, 289–300 (2011).
- 895 53. Ilhan, Z. E., Marcus, A. K., Kang, D.-W., Rittmann, B. E. & Krajmalnik-Brown, R. pH-  
896 Mediated Microbial and Metabolic Interactions in Fecal Enrichment Cultures. *mSphere* **2**,  
897 1–12 (2017).
- 898 54. Walker, A. W., Duncan, S. H., Carol McWilliam Leitch, E., Child, M. W. & Flint, H. J. pH  
899 and peptide supply can radically alter bacterial populations and short-chain fatty acid  
900 ratios within microbial communities from the human colon. *Appl. Environ. Microbiol.* **71**,  
901 3692–3700 (2005).
- 902 55. Belenguer, A. *et al.* Impact of pH on lactate formation and utilization by human fecal  
903 microbial communities. *Appl. Environ. Microbiol.* **73**, 6526–6533 (2007).
- 904 56. Reichardt, N. *et al.* Specific substrate-driven changes in human faecal microbiota  
905 composition contrast with functional redundancy in short-chain fatty acid production.  
906 *ISME J.* **12**, 610–622 (2018).
- 907 57. Loubinoux, J., Bronowicki, J. P., Pereira, I. A. C., Mougénel, J. L. & Le Faou, A. E.  
908 Sulfate-reducing bacteria in human feces and their association with inflammatory bowel  
909 diseases. *FEMS Microbiol. Ecol.* **40**, 107–112 (2002).
- 910 58. Babidge, W., Millard, S. & Roediger, W. Sulfides impair short chain fatty acid  $\beta$ -oxidation  
911 at acyl-CoA dehydrogenase level in colonocytes: Implications for ulcerative colitis. *Mol.*  
912 *Cell. Biochem.* **181**, 117–124 (1998).

- 913 59. Devkota, S. *et al.* Dietary-fat-induced taurocholic acid promotes pathobiont expansion  
914 and colitis in *Il10<sup>-/-</sup>* mice. *Nature* **487**, 104–108 (2012).
- 915 60. Natividad, J. M. *et al.* *Bilophila wadsworthia* aggravates high fat diet induced metabolic  
916 dysfunctions in mice. *Nat. Commun.* **9**, 2802 (2018).
- 917 61. Veiga, P., Suez, J., Derrien, M. & Elinav, E. Moving from probiotics to precision  
918 probiotics. *Nat. Microbiol.* (2020). doi:10.1038/s41564-020-0721-1
- 919 62. Costello, Z. & Martin, H. G. A machine learning approach to predict metabolic pathway  
920 dynamics from time-series multiomics data. *npj Syst. Biol. Appl.* **4**, 1–14 (2018).
- 921 63. Patnode, M. L. *et al.* Interspecies Competition Impacts Targeted Manipulation of Human  
922 Gut Bacteria by Fiber-Derived Glycans. *Cell* **179**, 59-73.e13 (2019).
- 923 64. Silverstein, T. P. Fitting imidazole 1H NMR titration data to the Henderson-Hasselbalch  
924 equation. *J. Chem. Educ.* **89**, 1474–1475 (2012).
- 925 65. Cline, J. D. Spectrophotometric Determination of Hydrogen Sulfide in Natural Waters.  
926 *Limnol. Oceanogr.* **14**, 454–458 (1969).
- 927 66. Zhang, J., Kobert, K., Flouri, T. & Stamatakis, A. PEAR: A fast and accurate Illumina  
928 Paired-End reAd mergeR. *Bioinformatics* **30**, 614–620 (2014).
- 929 67. Schloss, P. D. *et al.* Introducing mothur: Open-source, platform-independent, community-  
930 supported software for describing and comparing microbial communities. *Appl. Environ.*  
931 *Microbiol.* **75**, 7537–7541 (2009).
- 932 68. Momeni, B., Xie, L. & Shou, W. Lotka-Volterra pairwise modeling fails to capture diverse  
933 pairwise microbial interactions. *Elife* **6**, e25051 (2017).
- 934
- 935

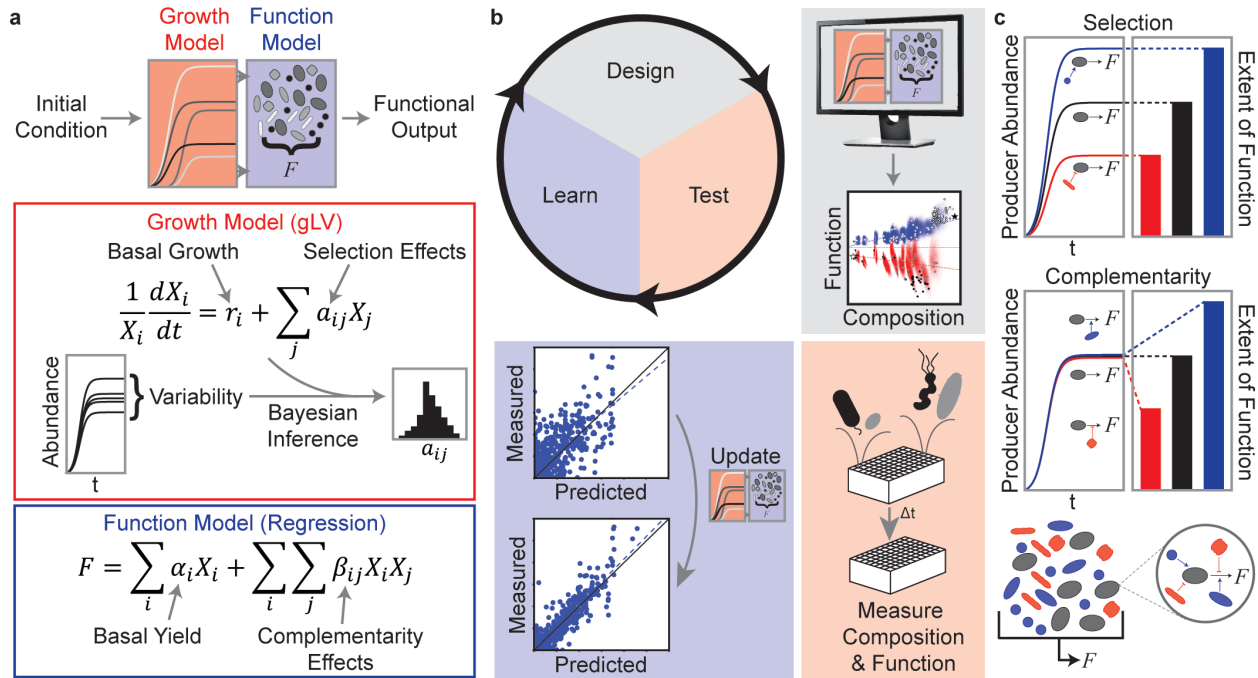

936  
937  
938  
939  
940  
941  
942  
943  
944  
945  
946  
947  
948  
949  
950  
951  
952  
953  
954

**Figure 1. Iterative modeling framework to predict microbial community assembly and function.** (a) Two-stage modeling framework for predicting community assembly and function. The generalized Lotka-Volterra model (gLV) represents community dynamics. The inter-species interaction terms represent the selection effects described in c. A Bayesian Inference approach was used to determine parameter uncertainties due to biological and technical variability. A linear regression model with interactions represents the complementarity effects as described in c. Combining these two models enables prediction of a probability distribution of the functional activity from initial species concentrations. (b) Model-guided iterative experimental approach for developing a model to predict community assembly and butyrate production. First, we use our model to explore the design space of possible experiments (i.e. different initial conditions of species presence/absence) and design communities that span the range of expected functional outputs. Next, we use high-throughput experimental methods to measure species abundance and functional outputs. Finally, we evaluate the model's capability to accurately predict the experimental data and train the model on new data for the next iteration. (c) Inter-species interactions that impact the functional output of an organism can be driven by selection (top) or complementarity (bottom) effects. In this model, the total functional output of the communities is determined by a combination of these effects.

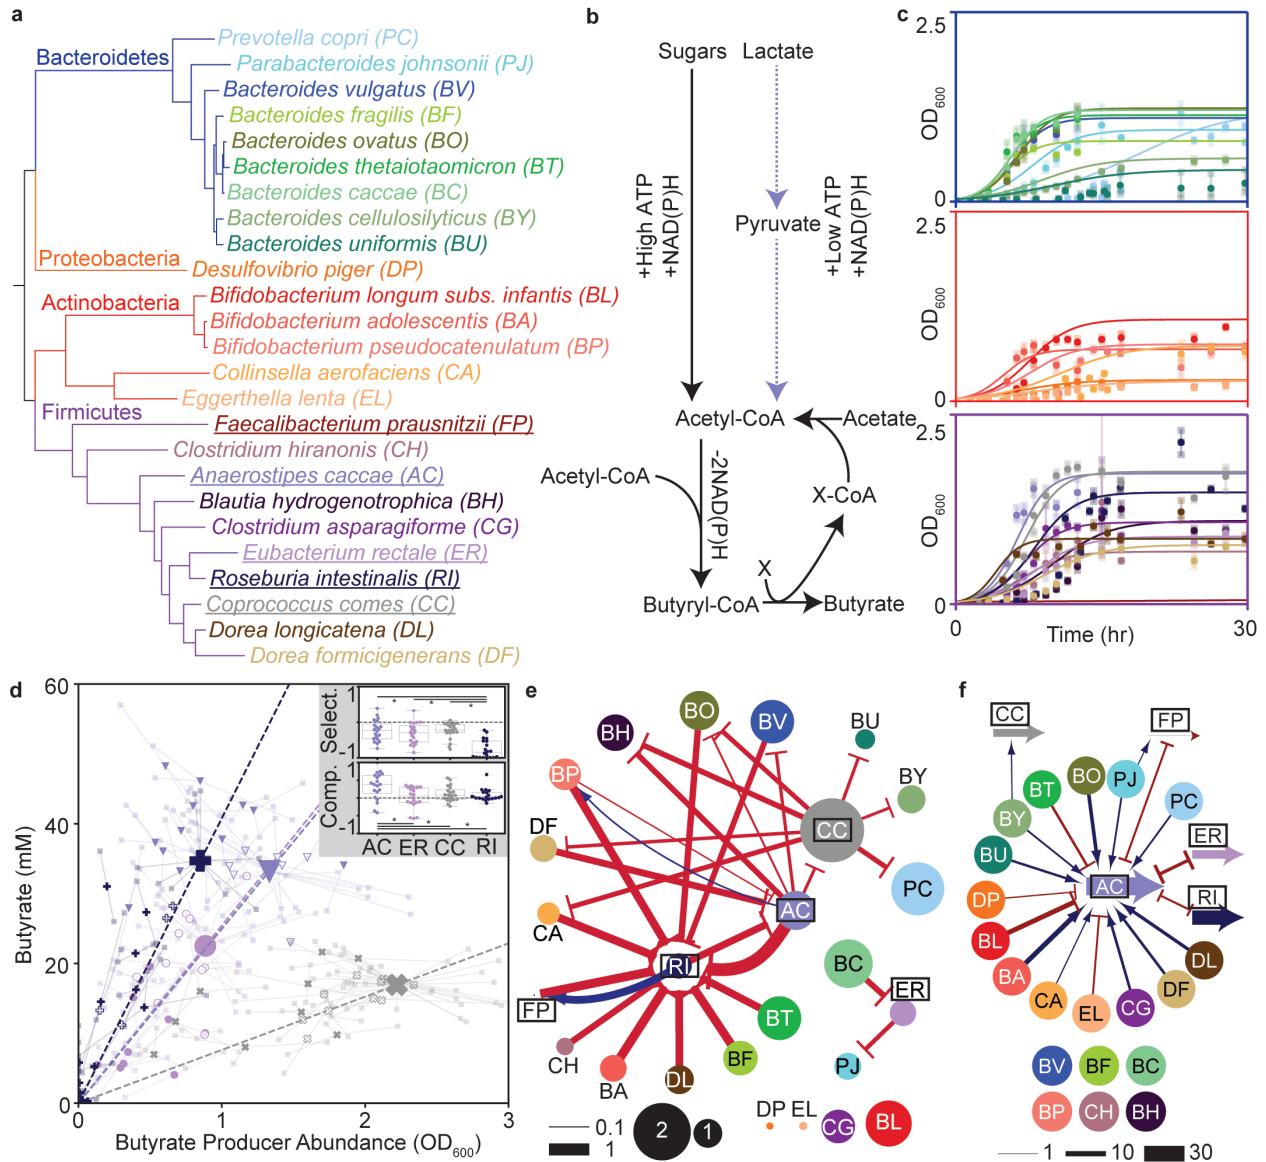

955  
 956 **Figure 2. Characterizing interaction types in two-species communities.** (a) Phylogenetic tree  
 957 of the synthetic human gut microbiome community composed of 25 highly prevalent and diverse  
 958 species. Branch color indicates phylum and underlined species denote butyrate producers. (b)  
 959 Metabolic pathways for the transformation of sugars, acetate, and lactate into butyrate.  
 960 Conversion of sugars or lactate to acetyl-CoA generates ATP and NAD(P)H, with higher ATP  
 961 production per NAD(P)H from sugars. NAD(P)H is oxidized through conversion of acetyl-CoA to  
 962 butyryl-CoA. Many substrates (X) can be used to exchange CoA between acetate and/or butyrate.  
 963 In our system, *Anaerostipes caccae* has the unique capability to utilize the lactate conversion  
 964 pathway (purple dashed arrows). (c) Monospecies growth responses over time. Transparent  
 965 symbols indicate biological replicates connected to the corresponding mean (solid symbols) by  
 966 transparent lines. Solid lines represent the generalized Lotka-Volterra (gLV) model fit to the data.  
 967 Each plot shows the growth curves for species within the Bacteroidetes (top),  
 968 Actinobacteria/Proteobacteria (middle) or Firmicutes (bottom) phylum. (d) Scatter plot of butyrate  
 969 producer abundance and butyrate concentration for all pairwise communities containing at least  
 970 one butyrate producer. Solid symbols indicate the mean of biological replicates of a community.  
 971 Large symbols indicate butyrate producer monoculture. Smaller symbols indicate two-species

972 communities, with closed symbols denoting significant differences in butyrate concentration  
973 and/or butyrate-producer abundance from the monoculture ( $p < 0.05$ , t-test, unequal variance).  
974 Transparent squares indicate biological replicates and are connected to the corresponding mean  
975 with lines. Dashed lines indicate the predicted butyrate concentration assuming a constant  
976 butyrate yield based on monoculture data. Inset: distribution of selection and complementarity  
977 effects normalized by monoculture butyrate concentration for two-species communities. Asterisks  
978 indicate significant difference in the mean across butyrate producers ( $p < 0.05$ , t-test, unequal  
979 variance) **(e)** Network representation of the inferred gLV inter-species interaction network based  
980 on data from **b** and **c**. Nodes size represents the abundance of each species in monoculture  
981 ( $OD_{600}$ ) at 48 hr and edges indicate interaction parameters with widths proportional to magnitude  
982 (units of  $hr^{-1} OD_{600}^{-1}$ ) and color indicating sign (red negative, blue positive). Only edges with  $>95\%$   
983 confidence in sign are shown. **(f)** Network representation of regression model trained on data  
984 from **b** and **c**. Butyrate producer arrows denote monoculture butyrate production, nodes indicate  
985 non-butyrate producers, and edges represent modification of butyrate production in two-species  
986 communities. Edges connecting two butyrate producer arrows appear as bidirectional arrows  
987 since the directionality of the effect cannot be inferred. Edge widths are proportional to butyrate  
988 production (units of mM Butyrate). Only interactions with magnitude greater than 2 mM are shown.  
989



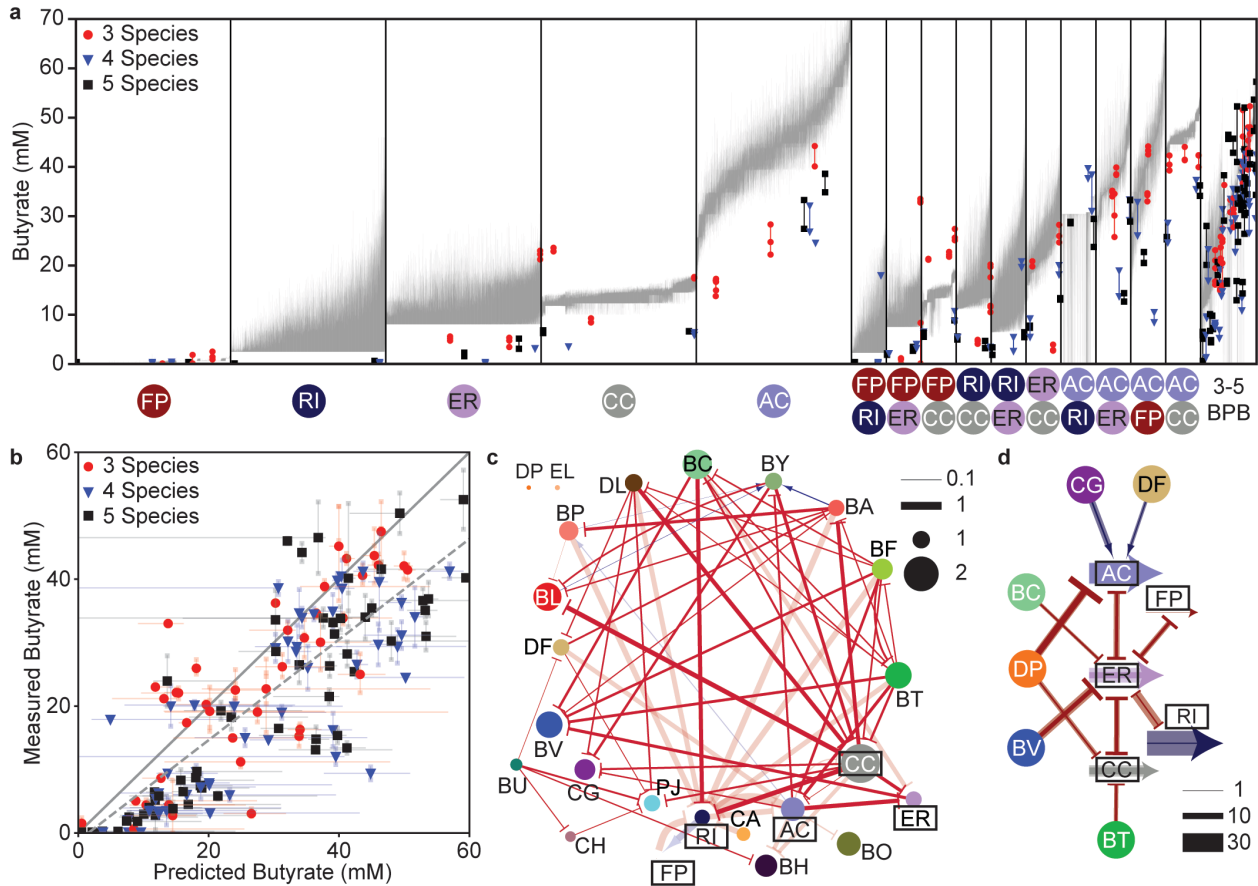

990

991

992

993

994

995

996

997

998

999

1000

1001

1002

1003

1004

1005

1006

1007

1008

1009

1010

1011

1012

1013

1014

**Figure 3. Model-guided investigation of low complexity synthetic human gut communities.**

**(a)** Predicted (grey bars) and measured (data points) butyrate concentrations for all 3-5 member communities containing at least one butyrate producer. Vertical black lines separate groups of communities based on the identities of the combination of butyrate producers specified on the x-axis. Communities with all combinations of 3-5 butyrate producers are included in the final bin for simplicity. Within each bin, communities are sorted in rank order of increasing median predicted butyrate production with a vertical grey bar indicating the 60 percent confidence interval of predictions for each community. Data points represent biological replicates of a selected subset of communities with replicates of a community connected by lines and the data point type indicating the number of species in each community (156 communities total). **(b)** Scatter plot of predicted and measured butyrate concentrations for communities in **a**. Transparent datapoints represent biological replicates of a community and are connected to the corresponding mean measurement (solid datapoints) by transparent lines. Prediction error bars indicate the 60 percent confidence interval of predicted butyrate. Solid grey line indicates  $x=y$  and dashed line indicates the linear regression between the mean measurement and median prediction ( $y=0.79x-1.2$ , Pearson  $r=0.83$ ,  $p=6 \times 10^{-41}$ ). Data point type indicates the number of species in each community. **(c)** Network representation of generalized Lotka-Volterra model updated with data from **b**. Node size represents the abundance of each species in monoculture ( $OD_{600}$ ), edge widths denote the magnitude of the inter-species interaction coefficients (units of  $hr^{-1} OD_{600}^{-1}$ ) and color of the edges corresponds to the sign (red negative, blue positive). Faint interaction edges indicate interactions that did not change from the model trained on monospecies and pairwise communities (<2-fold change in magnitude of parameter mean). Only edges with >95% confidence in sign are shown. **(d)** Network representation of contributions of updated regression model to butyrate production in communities from **b**. Butyrate producer arrows indicate contribution to butyrate production

1015 independent of interactions. Nodes indicate non-butyrate producing species, and edges indicate  
1016 modification of butyrate production in communities from **b**. Edges connecting two butyrate  
1017 producers are bidirectional because it is not possible to discern which organism is producing the  
1018 butyrate. For each butyrate producer, solid edge widths are proportional to the mean contribution  
1019 and faint edge widths are proportional to the maximum contribution of the interaction across  
1020 communities where those species were present (units of mM butyrate). Only interactions with  
1021 maximum contribution >5 mM and with at least 4 communities including that interaction are  
1022 shown.  
1023



1025 **Figure 4. Model-guided exploration of butyrate production landscape. (a)** Scatter plot of  
1026 Euclidean distance in community absolute abundance from predicted full 25-member community  
1027 versus predicted butyrate concentration for all possible communities. Histograms indicate the  
1028 distribution of communities across the given axis. Communities are colored according to the  
1029 presence (red) or absence (blue) of *Desulfovibrio piger* (DP). Blue and red dashed lines indicate  
1030 the linear regression of communities with (red,  $y=-1.7x+25.5$ ,  $r=-0.26$ ) or without (blue,  
1031  $y=3.1x+27.8$ ,  $r=0.72$ ) DP. The white star indicates the full 25-member community and black star  
1032 indicates the community of all butyrate producers. Large data points indicate communities chosen  
1033 for experimental validation. Black triangles indicate leave-one-out communities, black circles  
1034 indicate designed communities, and grey squares indicate random communities, with  
1035 open/closed symbols indicating absence/presence of DP. **(b)** Scatter plot of Euclidean distance  
1036 in community composition from predicted 24-member community excluding *Anaerostipes caccae*  
1037 (AC) versus predicted butyrate concentration for all possible communities. Histograms indicate  
1038 the distribution of communities across the given axis. Grey dashed line indicates the mean  
1039 predicted butyrate concentration across all communities. Blue dashed line indicates the linear  
1040 regression of all communities ( $y=8.3x-1.4$ ,  $r=0.50$ ). The white star indicates the full 24-member  
1041 community and the black star indicates the 4 butyrate-producer community. Large data points  
1042 indicate communities chosen for experimental validation. Inset: mean experimental  
1043 measurements of butyrate concentration (black) and total abundance of butyrate producers (red)  
1044 versus the distance from the full 24-member community. The grey and red dashed lines represent  
1045 the mean butyrate concentration and total butyrate producer abundances across measured  
1046 communities, respectively. **(c)** Scatter plot of predicted versus measured butyrate concentration  
1047 for communities in **a**. Transparent data points indicate biological replicates and are connected to  
1048 the corresponding mean values by transparent lines. Data points denote the median with error  
1049 bars spanning the 60% confidence interval. Solid line indicates  $x=y$ . Dashed line indicates linear  
1050 regression of median prediction versus mean measurement ( $y=1.2x+3.0$ ,  $r=0.59$ ,  $p=1*10^{-18}$ ).  
1051 Legend indicates statistically significant differences in measured butyrate between populations of  
1052 communities (Kruskal-Wallis test). **(d)** Scatter plot of predicted versus measured butyrate for  
1053 communities in **b**. Transparent data points indicate biological replicates and are connected to the  
1054 corresponding mean by transparent lines. Data points represent the median with error bars  
1055 spanning the 60% confidence interval. Solid grey line indicates  $x=y$ . Dashed line indicates the  
1056 linear regression of the median versus mean measurement ( $y=0.1x+2.6$ ,  $r=0.44$ ,  $p=2*10^{-5}$ ). **(e)**  
1057 Scatter plot of predicted versus measured butyrate for complex communities using model M3.  
1058 Transparent data points indicate biological replicates and are connected to the corresponding  
1059 mean by transparent lines. Solid grey line indicates  $x=y$ . Dashed line indicates linear regression  
1060 of prediction versus mean measurement ( $y=0.99x-4.6$ ,  $r=0.86$ ,  $p=1*10^{-44}$ ). **(f)** Heat-map of the  
1061 median value of the inter-species interaction coefficients ( $a_{ij}$ ) for the M3 gLV model. Interactions  
1062 impacting AC and DP are annotated with L+ or L- if species  $j$  produced or consumed  $>10$  mM  
1063 lactate in monoculture. Inter-species interactions included in the model community C1 from  
1064 (Venturelli et al., Mol. Sys. Bio., 2018)<sup>6</sup> are annotated with C+ or C- if interactions from both  
1065 models had magnitudes greater than  $0.05 \text{ hr}^{-1}$  and had the same or opposite sign, respectively.  
1066 **(g)** Network representation of updated M3 regression model. Butyrate producer arrows indicate  
1067 contribution to butyrate production independent of inter-species interactions. Nodes indicate non-  
1068 butyrate producing species, and edges indicate modification of butyrate production (blue,  
1069 increased; red, decreased) in all complex communities ( $>10$  species). Solid edge widths are  
1070 proportional to the mean contribution and faint edge widths are proportional to the maximum  
1071 contribution of the interaction across communities where those species were present (units of mM  
1072 butyrate). Only interactions with maximum contribution  $>5$  mM and with at least 4 communities  
1073 including that interaction are shown.  
1074  
1075

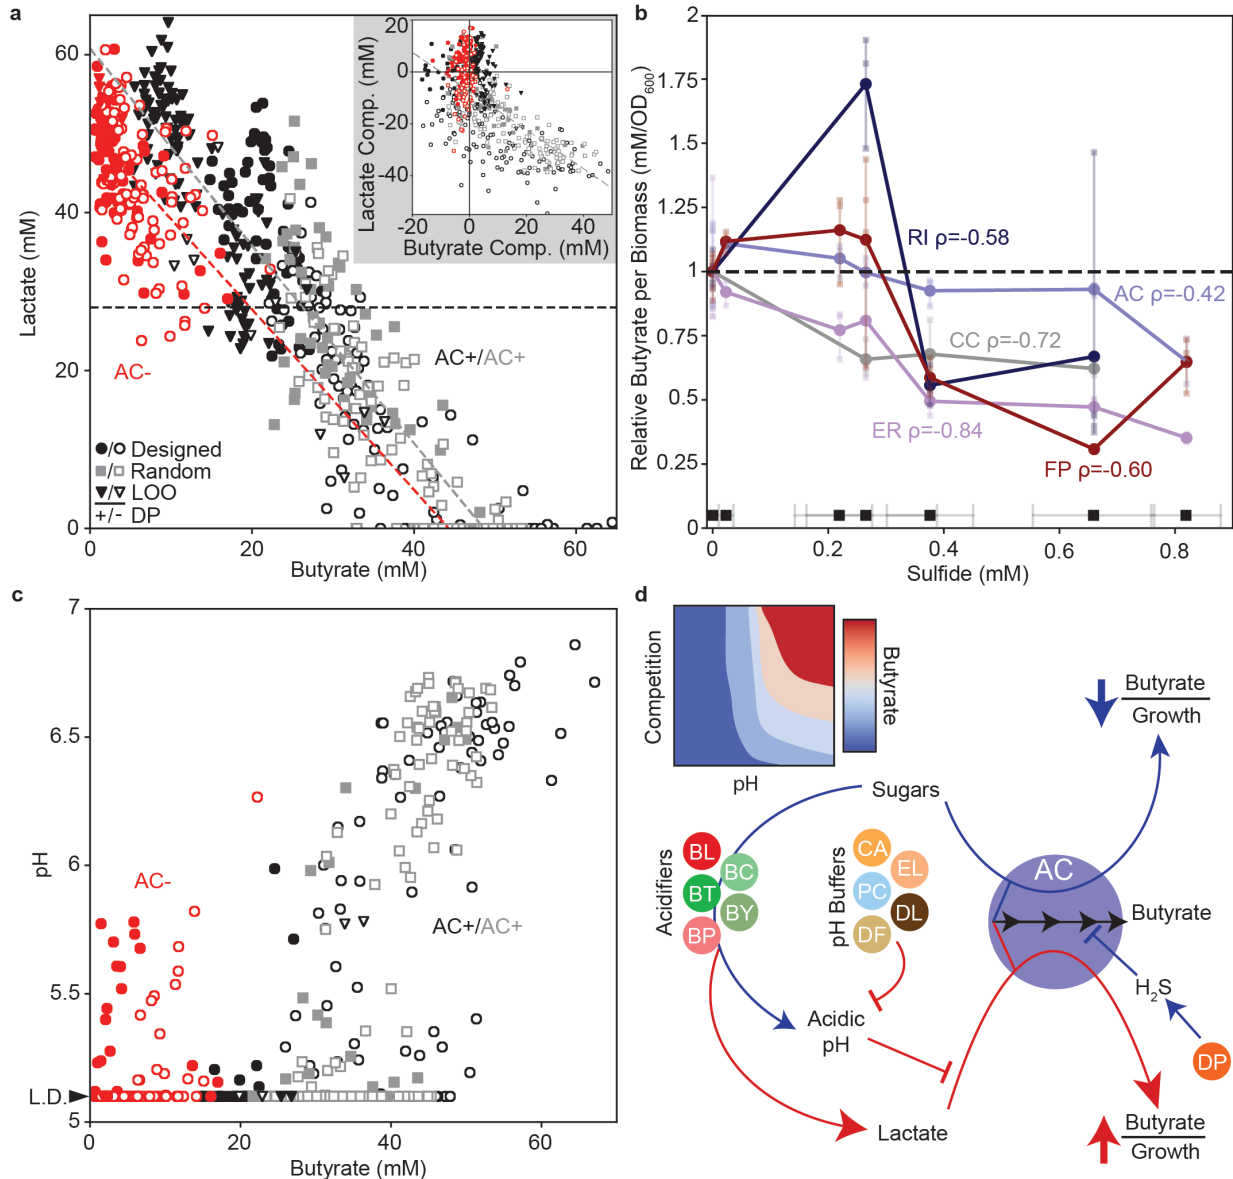

1076  
1077  
1078  
1079  
1080  
1081  
1082  
1083  
1084  
1085  
1086  
1087  
1088  
1089  
1090  
1091

**Figure 5. Model-guided identification of molecular mechanisms impacting butyrate production.** (a) Scatter plot of butyrate concentration versus lactate concentration for complex communities (>10 species). Each data point indicates a biological replicate of a community. Grey dashed line indicates the linear regression for communities containing AC ( $y = -1.3x + 61$ ,  $r = -0.91$ ,  $p = 5 \times 10^{-182}$ ), red dashed line indicates the linear regression for communities lacking AC ( $y = -1.1x + 51$ ,  $r = -0.56$ ,  $p = 8 \times 10^{-16}$ ) and black horizontal dashed line indicates initial concentration of lactate in the media (28 mM). Inset: butyrate complementarity versus lactate complementarity. Grey dashed line indicates the linear regression for communities containing AC ( $y = -0.75x - 7.5$ ,  $r = -0.63$ ,  $p = 4 \times 10^{-53}$ ). Pearson correlation for communities lacking AC was not statistically significant ( $p = 0.12$ ). (b) Butyrate concentration per unit biomass as a function of sulfide concentration. Butyrate yield per biomass was normalized to the no sulfide condition. Circles indicate the mean of biological replicates, with individual replicates shown as transparent squares. Black squares indicate the mean measured sulfide concentration for each treatment level with error bars indicating the standard deviation of at least 10 technical replicates. Species labels are accompanied by statistically significant Spearman correlation coefficients ( $\rho$ ) between all

1092 biological replicates of that species and mean sulfide concentration for each level ( $p < 0.05$ , AC  
1093  $p = 0.02$ ; CC  $p = 0.002$ ; ER  $p = 3 \times 10^{-8}$ ; RI  $p = 0.02$ ; FP  $p = 0.0008$ ). **(c)** Scatter plot of butyrate  
1094 concentration versus pH for complex communities. Each data point indicates a biological replicate  
1095 of a community. **(d)** Schematic representing proposed driving mechanisms impacting butyrate  
1096 production by AC in complex communities. Red edges denote processes that negatively impact  
1097 butyrate production and blue edges represent processes that enhance butyrate production. The  
1098 abundance of species that acidify the environment were positively correlated with lactate  
1099 concentration and negatively correlated with pH in complex communities. The abundance of pH  
1100 buffering species were positively correlated with pH in complex communities. Note that species  
1101 contributions to these processes are expected to be context-dependent. Inset: proposed  
1102 qualitative butyrate landscape as a function of the strength of resource competition for sugars and  
1103 environmental pH.
